# Supplementary material for: Genetic diversity and sequence polymorphism of bacterial 16S rRNA isolates from beef tripe from Gaborone, Botswana
Source: Research Square preprint supplement (doi:10.21203/rs.3.rs-8590956/v1), 2026-02-20
Supplement: Supplementary file 1 [file 44967853cf42fb39270a501f.xlsx]

## Sheet: Nucleotide_Diversity
	Start	End	Nucleotide_Diversity
	0	50	0.606202
	20	70	0.680267
	30	80	0.661867
	40	90	0.671192
	50	100	0.680897
	60	110	0.675228
	370	420	0.691451
	380	430	0.692077
	850	900	0.688707
	860	910	0.690424
	870	920	0.682016
	880	930	0.692994

## Sheet: PCA
	PC1	PC2
	-4.96411	4.57729
	-0.732942	-2.73084
	0.632176	-4.10831
	-11.0664	16.6263
	21.5411	8.30129
	-6.32135	5.93153
	21.8057	9.12549
	-10.981	16.2884
	-6.24432	-4.15856
	-2.80447	-3.60003
	21.5674	9.4223
	20.2592	7.86267
	-10.3745	15.7448
	4.80394	-9.423
	-5.85867	-5.13961
	0.277317	2.27864
	0.864334	-8.31293
	-3.06749	-3.56182
	-6.89132	6.79918
	2.98105	1.17911
	21.7708	9.09517
	-5.26714	4.75393
	-1.08109	-0.752657
	-7.57744	11.3061
	-0.629939	-1.726
	-1.3182	-0.679492
	-1.3182	-0.679492
	-0.408522	-8.30081
	-0.422487	-9.1034
	0.298135	-8.49989
	-2.02647	0.395695
	3.1382	-10.8349
	4.12561	1.05841
	-1.73894	-4.85245
	-1.87497	0.378075
	-1.3454	-1.96317
	-1.33661	-1.95774
	-2.14973	-3.34599
	-10.7284	15.7857
	-0.617504	-2.04541
	-1.11239	-0.685105
	2.56545	-10.6073
	-0.250162	-8.70818
	-1.10295	-3.44471
	-3.88421	3.36232
	-8.18892	10.3288
	-1.69722	0.647527
	2.80604	1.19532
	2.80443	-10.9714
	17.2788	4.49678
	-6.59336	6.3161
	-10.1786	15.6513
	21.6122	8.72648
	2.87248	-11.3947
	3.94806	2.53059
	-8.74363	10.2933
	0.942092	-8.80561
	-0.966429	2.80581
	-4.80685	5.31536
	-4.05135	-2.48647
	-0.00699189	-4.90062
	0.231796	-8.48127
	-2.09758	-0.573333
	0.898171	-3.86764
	0.889703	-8.5979
	20.4847	8.16496
	0.960895	-8.71055
	-5.33028	4.93329
	-3.34428	-3.67643
	0.6934	1.66106
	-2.12227	-1.56249
	0.275737	-3.25117
	-1.33503	-1.52247
	-1.22357	-1.68513
	-6.44063	-5.11931
	-11.1299	15.7332
	-6.48	-4.63264
	-6.83165	-4.37593
	-0.863465	-0.0537948
	-0.707071	0.293847
	-2.59548	-1.0465
	-0.236804	-3.90668
	21.8113	9.19206
	-1.04566	-8.95122
	-4.94483	5.70567
	0.622632	-4.37186
	-2.3063	-1.69642
	-4.89589	1.9322
	19.9006	7.28582
	-10.2444	15.159
	2.85629	-11.2586
	-0.568705	-8.82609
	0.960232	-8.34849
	-3.6728	4.89601
	2.55114	-11.359
	-6.44851	-4.85337
	-4.99374	2.55989
	-0.458662	-8.30258
	0.0353298	-6.41199
	-1.01818	-2.87349

## Sheet: Haplotype Identity
	Haplotype name	Isolate code	Isolate name	Haplotype count
	H1	TB35	Exiguobacterium profundum	1
	H2	TB58	Lysinibacillus sphaericus	1
	H3	TB28	Lysinibacillus sphaericus	1
	H4	TB30	Metalysinibacillus jejuensis	1
	H5	TB27	Lysinibacillus sphaericus	1
	H6	TB53	Kurthia spp.	1
	H7	TB60	Uncultured Kurthia spp.	1
	H8	TB43	Kurthia gibsonii	1
	H9	TB24	Kurthia gibsonii	1
	H10	TB54	Kurthia gibsonii	1
	H11	TB70	Kurthia gibsonii	1
	H12	TB71	Kurthia gibsonii	1
	H13	TB32	Kurthia gibsonii	1
	H14	TB65	Kurthia gibsonii	1
	H15	TB62	Kurthia gibsonii	1
	H16	TB64A	Kurthia gibsonii	1
	H17	TB68	Exiguobacterium profundum	1
	H18	TB69	Macrococcoides caseolyticum	1
	H19	TB36	Macrococcus caseolyticus	1
	H20	TB33	Macrococcoides caseolyticum	1
	H21	TB44	Macrococcoides caseolyticum	1
	H22	TB83	Macrococcoides caseolyticum	1
	H23	TB25A	Macrococcoides caseolyticum	1
	H24	TB29	Macrococcoides caseolyticum	1
	H25	TB61	Macrococcoides caseolyticum	1
	H26	TB59	Macrococcoides caseolyticum	1
	H27	TB37A	Macrococcoides caseolyticum	1
	H28	TB23	Macrococcoides caseolyticum	1
	H29	TB25B	Pseudomonas aeruginosa	2
	H29	TB26	Macrococcoides caseolyticum	2
	H30	TB96	Pantoea spp.	1
	H31	TB3	Enterobacteriaceae_bacterium	1
	H32	TB84	Enterobacteriaceae_bacterium	1
	H33	TB76	Pseudomonas aeruginosa	1
	H34	TB77	Pseudomonas aeruginosa	1
	H35	TB78A	Pseudomonas aeruginosa	1
	H36	TB90	Acinetobacter spp.	1
	H37	TB34	Acinetobacter spp.	1
	H38	TB38	Acinetobacter lwoffii	1
	H39	TB55	Shewanella spp.	1
	H40	TB9	Aeromonas veronii	1
	H41	TB57	Aeromonas rivipollensis	1
	H42	TB19	Aeromonas spp.	1
	H43	TB1	Aeromonas caviae	1
	H44	TB82	Aeromonas dhakensis	1
	H45	TB22	Aeromonas allosaccharophila	1
	H46	TB93	Aeromonas veronii	1
	H47	TB78B	Aeromonas veronii	1
	H48	TB13	Aeromonas veronii	1
	H49	TB18	Aeromonas caviae	1
	H50	TB73	Aeromonas hydrophila	1
	H51	TB37	Aeromonas veronii	1
	H52	TB74	Aeromonas veronii	1
	H53	TB75	Aeromonas veronii	1
	H54	TB10	Aeromonas allosaccharophila	1
	H55	TB66	Aeromonas allosaccharophila	1
	H56	TB15	Aeromonas sobria	1
	H57	TB72	Aeromonas sobria	1
	H58	TB4	Aeromonas sobria	1
	H59	TB8	Aeromonas veronii	1
	H60	TB20	Aeromonas veronii	1
	H61	TB56	Moellerella wisconsensis	1
	H62	TB6	Moellerella wisconsensis	1
	H63	TB48	Enterobacter_cloacae	1
	H64	TB46	Escherichia coli	1
	H65	TB42	Escherichia coli	1
	H66	TB50	Escherichia coli	1
	H67	TB92	Escherichia coli	1
	H68	TB49	Escherichia coli	1
	H69	TB7	Escherichia coli	1
	H70	TB5	Escherichia coli	1
	H71	TB2	Escherichia coli	1
	H72	TB80	Escherichia fergusonii	1
	H73	TB11	Escherichia coli	1
	H74	TB16	Escherichia spp.	1
	H75	TB21	Escherichia coli	1
	H76	TB97	Escherichia coli	1
	H77	TB12	Escherichia coli	1
	H78	TB64	Hafnia alvei	1
	H79	TB94	Hafnia paralvei	1
	H80	TB95	Buttiauxella agrestis	1
	H81	TB17	Raoultella spp.	1
	H82	TB39	Klebsiella pneumoniae	1
	H83	TB88	Klebsiella pneumoniae	1
	H84	TB86	Klebsiella pneumoniae	1
	H85	TB31A	Klebsiella pneumoniae	1
	H86	TB85	Klebsiella pneumoniae	1
	H87	TB89	Klebsiella pneumoniae	1
	H88	TB40	Klebsiella pneumoniae	1
	H89	TB81	Klebsiella pneumoniae	1
	H90	TB31A	Klebsiella pneumoniae	1
	H91	TB91	Pluralibacter gergoviae	1
	H92	TB52	Citrobacter freundii	1
	H93	TB41	Enterobacter hormaechei	1
	H94	TB45	Enterobacter huaxiensis	1
	H95	TB47	Enterobacter cloacae	1
	H96	TB51	Enterobacter kobei	1
	H97	TB14	Klebsiella oxytoca	1
	H98	TB67	Lelliottia nimipressuralis	1
	H99	TB87	Lelliottia spp.	1

## Sheet: Haplotype across regions
	Haplotype	BBS mall	Block 3	Block 5	Block 6	Block 8	Extension 4	G-west	G-west industrial	Ledumang	Maruapula	Old Naledi	Partial	Phakalane	Phase 2	Phase 4	Sebele	Station
	H1	0	0	0	0	0	0	0	0	1	0	0	0	0	0	0	0	0
	H10	0	0	0	0	0	0	0	0	0	0	0	0	1	0	0	0	0
	H11	0	0	0	0	0	0	0	0	0	0	0	0	0	1	0	0	0
	H12	0	0	0	0	0	0	0	0	0	0	0	0	0	1	0	0	0
	H13	0	0	0	0	0	0	0	0	0	0	0	0	0	1	0	0	0
	H14	0	0	0	0	0	0	0	0	0	0	0	0	0	1	0	0	0
	H15	0	0	0	0	0	0	0	0	0	0	0	0	0	1	0	0	0
	H16	0	0	0	0	0	0	0	0	0	0	0	0	0	0	0	1	0
	H17	0	0	0	0	0	0	0	0	0	0	0	0	0	0	0	1	0
	H18	0	0	0	0	0	0	0	0	0	0	0	0	0	0	0	1	0
	H2	0	0	0	0	0	0	0	0	1	0	0	0	0	0	0	0	0
	H20	0	0	0	0	0	0	0	0	0	0	0	0	0	0	0	1	0
	H21	0	0	1	0	0	0	0	0	0	0	0	0	0	0	0	0	0
	H22	0	0	1	0	0	0	0	0	0	0	0	0	0	0	0	0	0
	H23	0	0	1	0	0	0	0	0	0	0	0	0	0	0	0	0	0
	H24	0	0	1	0	0	0	0	0	0	0	0	0	0	0	0	0	0
	H25	0	0	1	0	0	0	0	0	0	0	0	0	0	0	0	0	0
	H26	0	0	0	0	0	0	0	0	0	1	0	0	0	0	0	0	0
	H27	0	0	0	0	0	0	0	0	0	1	0	0	0	0	0	0	0
	H28	0	0	0	0	0	0	0	0	0	1	0	0	0	0	0	0	0
	H29	0	0	0	0	0	0	0	0	0	1	0	0	0	0	0	0	0
	H3	0	0	0	0	0	0	0	0	1	0	0	0	0	0	0	0	0
	H30	0	0	0	0	0	0	0	0	0	0	0	1	0	0	0	0	0
	H31	0	0	0	0	0	0	0	0	0	0	0	1	0	0	0	0	0
	H32	0	0	0	0	0	0	0	0	0	0	0	1	0	0	0	0	0
	H33	0	0	0	0	0	0	0	0	0	0	0	1	0	0	0	0	0
	H34	0	0	0	0	0	0	0	0	0	0	0	1	0	0	0	0	0
	H35	0	0	0	0	0	0	0	0	0	0	0	0	0	0	1	0	0
	H36	0	0	0	0	0	0	0	0	0	0	0	0	0	0	1	0	0
	H37	0	0	0	0	0	0	0	0	0	0	0	0	0	0	1	0	0
	H38	0	0	0	0	0	0	0	0	0	0	0	0	0	0	1	0	0
	H39	0	0	0	0	0	0	0	0	0	0	0	0	0	0	1	0	0
	H4	0	0	0	0	0	0	0	0	1	0	0	0	0	0	0	0	0
	H40	0	0	0	0	0	0	1	0	0	0	0	0	0	0	0	0	0
	H41	0	0	0	0	0	0	1	0	0	0	0	0	0	0	0	0	0
	H42	0	0	0	0	0	0	1	0	0	0	0	0	0	0	0	0	0
	H43	0	0	0	0	0	0	1	0	0	0	0	0	0	0	0	0	0
	H44	0	0	0	0	0	0	1	0	0	0	0	0	0	0	0	0	0
	H45	0	0	0	0	0	1	0	0	0	0	0	0	0	0	0	0	0
	H46	0	0	0	0	0	1	0	0	0	0	0	0	0	0	0	0	0
	H47	0	0	0	0	0	1	0	0	0	0	0	0	0	0	0	0	0
	H48	0	0	0	0	0	1	0	0	0	0	0	0	0	0	0	0	0
	H49	0	0	0	0	0	1	0	0	0	0	0	0	0	0	0	0	0
	H5	0	0	0	0	0	0	0	0	1	0	0	0	0	0	0	0	0
	H50	0	0	0	0	0	0	0	0	0	0	0	0	0	0	0	0	1
	H51	0	0	0	0	0	0	0	0	0	0	0	0	0	0	0	0	1
	H52	0	0	0	0	0	0	0	0	0	0	0	0	0	0	0	0	1
	H53	0	0	0	0	0	0	0	0	0	0	0	0	0	0	0	0	1
	H54	0	0	0	0	0	0	0	0	0	0	0	0	0	0	0	0	1
	H55	1	0	0	0	0	0	0	0	0	0	0	0	0	0	0	0	0
	H56	1	0	0	0	0	0	0	0	0	0	0	0	0	0	0	0	0
	H57	1	0	0	0	0	0	0	0	0	0	0	0	0	0	0	0	0
	H58	1	0	0	0	0	0	0	0	0	0	0	0	0	0	0	0	0
	H59	1	0	0	0	0	0	0	0	0	0	0	0	0	0	0	0	0
	H60	0	0	0	0	0	0	1	0	0	0	0	0	0	0	0	0	0
	H61	0	0	0	0	0	0	1	0	0	0	0	0	0	0	0	0	0
	H62	0	0	0	0	0	0	1	0	0	0	0	0	0	0	0	0	0
	H63	0	0	0	0	0	0	1	0	0	0	0	0	0	0	0	0	0
	H64	0	0	0	0	0	0	1	0	0	0	0	0	0	0	0	0	0
	H65	0	0	0	0	0	0	0	1	0	0	0	0	0	0	0	0	0
	H66	0	0	0	0	0	0	0	1	0	0	0	0	0	0	0	0	0
	H67	0	0	0	0	0	0	0	1	0	0	0	0	0	0	0	0	0
	H68	0	0	0	0	0	0	0	1	0	0	0	0	0	0	0	0	0
	H69	0	0	0	0	0	0	0	1	0	0	0	0	0	0	0	0	0
	H7	0	0	0	0	0	0	0	0	0	0	0	0	1	0	0	0	0
	H70	0	0	0	0	1	0	0	0	0	0	0	0	0	0	0	0	0
	H71	0	0	0	0	1	0	0	0	0	0	0	0	0	0	0	0	0
	H72	0	0	0	0	1	0	0	0	0	0	0	0	0	0	0	0	0
	H73	0	0	0	0	1	0	0	0	0	0	0	0	0	0	0	0	0
	H74	0	0	0	0	1	0	0	0	0	0	0	0	0	0	0	0	0
	H75	0	0	0	0	0	0	0	0	0	0	1	0	0	0	0	0	0
	H76	0	0	0	0	0	0	0	0	0	0	1	0	0	0	0	0	0
	H77	0	0	0	0	0	0	0	0	0	0	1	0	0	0	0	0	0
	H78	0	0	0	0	0	0	0	0	0	0	1	0	0	0	0	0	0
	H79	0	0	0	0	0	0	0	0	0	0	1	0	0	0	0	0	0
	H8	0	0	0	0	0	0	0	0	0	0	0	0	1	0	0	0	0
	H80	0	0	0	0	0	0	0	0	0	0	1	0	0	0	0	0	0
	H81	0	0	0	0	0	0	0	0	0	0	1	0	0	0	0	0	0
	H82	0	1	0	0	0	0	0	0	0	0	0	0	0	0	0	0	0
	H83	0	1	0	0	0	0	0	0	0	0	0	0	0	0	0	0	0
	H84	0	1	0	0	0	0	0	0	0	0	0	0	0	0	0	0	0
	H85	0	1	0	0	0	0	0	0	0	0	0	0	0	0	0	0	0
	H86	0	1	0	0	0	0	0	0	0	0	0	0	0	0	0	0	0
	H87	0	1	0	0	0	0	0	0	0	0	0	0	0	0	0	0	0
	H88	0	1	0	0	0	0	0	0	0	0	0	0	0	0	0	0	0
	H89	0	0	0	1	0	0	0	0	0	0	0	0	0	0	0	0	0
	H9	0	0	0	0	0	0	0	0	0	0	0	0	1	0	0	0	0
	H90	0	0	0	1	0	0	0	0	0	0	0	0	0	0	0	0	0
	H91	0	0	0	1	0	0	0	0	0	0	0	0	0	0	0	0	0
	H92	0	0	0	1	0	0	0	0	0	0	0	0	0	0	0	0	0
	H93	0	0	0	1	0	0	0	0	0	0	0	0	0	0	0	0	0
	H94	0	0	0	1	0	0	0	0	0	0	0	0	0	0	0	0	0
	H95	0	0	0	1	0	0	0	0	0	0	0	0	0	0	0	0	0
	H96	0	0	0	1	0	0	0	0	0	0	0	0	0	0	0	0	0
	H97	0	0	0	1	0	0	0	0	0	0	0	0	0	0	0	0	0
	H98	0	0	0	1	0	0	0	0	0	0	0	0	0	0	0	0	0
	H99	0	0	0	1	0	0	0	0	0	0	0	0	0	0	0	0	0

## Sheet: Haplotype network
	Haplotype	Sequence	Count
	H1	AGGGGGGGGAGGCTACACATGCAAGTCGAGCGGCAGCGGGAAAGTAGCTTGCTACTTTTGCCGGCGAGCGGCGGACGGGTGAGTAATGCCTGGGAAATTGCCCAGTCGAGGGGGATAACAGTTGGAAACGACTGCTAATACCGCATACGCCCTACGGGGGAAAGCAGGGGACCTTCGGGCCTTGCGCGATTGGATATGCCCAGGTGGGATTAGCTAGTTGGTGAGGTAATGGCTCACCAAGGCGACGATCCCTAGCTGGTCTGAGAGGATGATCAGCCACACTGGAACTGAGACACGGTCCAGACTCCTACGGGAGGCAGCAGTGGGGAATATTGCACAATGGGGGAAACCCTGATGCAGCCATGCCGCGTGTGTGAAGAAGGCCTTCGGGTTGTAAAG…	1
	H2	TGGGGGGGGCTACCATGCAGTCGAACGGTAACAGGAAGCAGCTTGCTGCTTTGCTGACGAGTGGCGGACGGGTGAGTAATGTCTGGGAAACTGCCTGATGGAGGGGGATAACTACTGGAAACGGTAGCTAATACCGCATAACGTCGCAAGACCAAAGAGGGGGACCTTCGGGCCTCTTGCCATCGGATGTGCCCAGATGGGATTAGCTTGTAGGTGGGGTAACGGCTCACCTAGGCGACGATCCCTAGCTGGTCTGAGAGGATGACCAGCCACACTGGAACTGAGACACGGTCCAGACTCCTACGGGAGGCAGCAGTGGGGAATATTGCACAATGGGCGCAAGCCTGATGCAGCCATGCCGCGTGTATGAAGAAGGCCTTCGGGTTGTAAAGTACTTTC…	1
	H3	ATGGGGGCGGCTAACCATGCAGTCGAGCGGTAGCACAGGGAGCTTGCTCCTGTTTGACGAGAGGGGGACGGGTGAGTAATGTGTGGGAAACTGCCTGATGGAGGGGGATATCTACTGTGAACGGTGGCTATTACCCCATAACGTCTTCTGACCCCAGAGGGGGGCCTTCGGGGCTCTTGCCATCTCATGTGCCCCCATGGGATTATCTATTATGTGAGGTAATGGGTCTCCTATGCGACAATCCCTATCTGTGCTGAGAGGATGACCACCCACACTGTAACTGAGACACGGTCCACACTCCTACAGGAGGCGGCAGTGGGGAATATTGCGCAATGGGCGCAAGCCTGATGCACCCATGCCGCGTGTATAAAAAAAGCCTTCTGGTTGTAAAGTACTTTC…	1
	H4	GGGGGGGGGGGCTACACATGCAAGTCGAGCGGCAGCGGGAAAGTAGCTTGCTACTTTTGCCGGCGAGCGGCGGACGGGTGAGTAATGCCTGGGGATCTGCCCAGTCGAGGGGGATAACTACTGGAAACGGTAGCTAATACCGCATACGCCCTACGGGGGAAAGCAGGGGACCTTCGGGCCTTGCGCGATTGGATGAACCCAGGTGGGATTAGCTAGTTGGTGAGGTAATGGCTCACCAAGGCGACGATCCCTAGCTGGTCTGAGAGGATGATCAGCCACACTGGAACTGAGACACGGTCCAGACTCCTACGGGAGGCAGCAGTGGGGAATATTGCACAATGGGGGAAACCCTGATGCAGCCATGCCGCGTGTGTGAAGAAGGCCTTCGGGTTGTAAAGC…	1
	H5	TGGGGCAGGGGCTACACATGCAGTCGAACGGTAACAGGAAGAAGCTTGCTTCTTTGCTGACGAGTGGCGGACGGGTGAGTAATGTCTGGGAAACTGCCTGATGGAGGGGGATAACTACTGGAAACGGTAGCTAATACCGCATAACGTCGCAAGACCAAAGAGGGGGACCTTCGGGCCTCTTGCCATCGGATGTGCCCAGATGGGATTAGCTAGTAGGTGGGGTAACGGCTCACCTAGGCGACGATCCCTAGCTGGTCTGAGAGGATGACCAGCCACACTGGAACTGAGACACGGTCCAGACTCCTACGGGAGGCAGCAGTGGGGAATATTGCACAATGGGCGCAAGCCTGATGCAGCCATGCCGCGTGTATGAAGAAGGCCTTCGGGTTGTAAAGTACT…	1
	H6	TGGGGGGGACTACACATGCAGTCGTACCAGTAACAGGCAGACAGCTTGCTGCTTCGCTGACGAGTGGCGGACGGGTGAGTAATGTCTGGGAAACTGCCTGATGGAGGGGGATAACTACTGGAAACGGTAGCTAATACCGCATAACGTCGCAAGACCAAAGAGGGGGACCTTCGGGCCTCTTGCCATCGGATGTGCCCAGATGGGATTAGCTAGTAGGTGGGGTAACGGCTCACCTAGGCGACGATCCCTAGCTGGTCTGAGAGGATGACCAGCCACACTGGAACTGAGACACGGTCCAGACTCCTACGGGAGGCAGCAGTGGGGAATATTGCACAATGGGCGCAAGCCTGATGCAGCCATGCCGCGTGTATGAAGAAGGCCTTCGGGTTGTAAAGTACT…	1
	H7	AGGGGGGGGGGACTACACATGCAGTCGAGCGGCAGCGGGAAAGTAGCTTGCTACTTTTGCCGGCGAGCGGCGGACGGGTGAGTAATGCCTGGGGATCTGCCCAGTCGAGGGGGATAACTACTGGAAACGGTAGCTAATACCGCATACGCCCTACGGGGGAAAGCAGGGGACCTTCGGGCCTTGCGCGATTGGATGAACCCAGGTGGGATTAGCTAGTTGGTGAGGTAATGGCTCACCAAGGCGACGATCCCTAGCTGGTCTGAGAGGATGATCAGCCACACTGGAACTGAGACACGGTCCAGACTCCTACGGGAGGCAGCAGTGGGGAATATTGCACAATGGGGGAAACCCTGATGCAGCCATGCCGCGTGTGTGAAGAAGGCCTTCGGGTTGTAAAGC…	1
	H8	TGGGGGGGCGGGACTACACATGCAAGTCGAGCGGCAGCGGGAAAGTATGTTGCTACTTTTGCCGGCGAGCGGCGGACGGGTGAGTAATGCCTGGGGATCTGCCCAGTCGAGGGGGATAACGGTTGGAAACGACTGCTAATACCGCATACGCCCTACGGGGGAAAGCAAGGGACCTTCCGGCCTTGCGCGATTGGATGAACCCAGGAGGGATTAGCTAGTTGGTGAGGTAATGGCTCACCAAGGCAACGATCCCTAGCTGGTCTGAAAGGATGATCACCCACACTGTAACTGAGACACGGTCCACACTCCTACGGGAGGCATCAGTGGGGAATATTGCACAATGGGGGAAACCCTGATGCATCCATGCCGCGTGTGTGAAGAAGGCCTTCGGGTTGTAAA…	1
	H9	GGGGGGGGGGGGGGGCTACACATGCAGTCGAGCGGCAGCGGGAAAGTAGCTTGCTACTTTTGCCGGCGAGCGGCGGACGGGTGAGTAATGCCTGGGGATCTGCCCAGTCGAGGGGGATAACAGTTGGAAACGACTGCTAATACCGCATACGCCCTACGGGGGAAAGCAGGGGACCTTCGGGCCTTGCGCGATTGGATGAACCCAGGTGGGATTAGCTAGTTGGTGAGGTAATGGCTCACCAAGGCGACGATCCCTAGCTGGTCTGAGAGGATGATCAGCCACACTGGAACTGAGACACGGTCCAGACTCCTACGGGAGGCAGCAGTGGGGAATATTGCACAATGGGGGAAACCCTGATGCAGCCATGCCGCGTGTGTGAAGAAGGCCTTCGGGTTGTAA…	1
	H10	ATGGGGGGAGACTACACATGCAGTCGAACGGTAACAGGAAGAAGCTTGCTTCTTTGCTGACGAGTGGCGGACGGGTGAGTAATGTCTGGGAAACTGCCTGATGGAGGGGGATAACTACTGGAAACGGTAGCTAATACCGCATAACGTCGCAAGACCAAAGAGGGGGACCTTCGGGCCTCTTGCCATCGGATGTGCCCAGATGGGATTAGCTTGTTGGTGGGGTAACGGCTCACCAAGGCGACGATCCCTAGCTGGTCTGAGAGGATGACCAGCCACACTGGAACTGAGACACGGTCCAGACTCCTACGGGAGGCAGCAGTGGGGAATATTGCACAATGGGCGCAAGCCTGATGCAGCCATGCCGCGTGTATGAAGAAGGCCTTCGGGTTGTAAAGTACT…	1
	H11	GGGGGGGGGGCTACACATGCAAGTCGAACGGTAACAGGAAGAAGCTTGCTTCTTTGCTGACGAGTGGCGGACGGGTGAGTAATGTCTGGGAAACTGCCTGATGGAGGGGGATAACTACTGGAAACGGTAGCTAATACCGCATAACGTCGCAAGACCAAAGAGGGGGACCTTCGGGCCTCTTGCCATCGGATGTGCCCAGATGGGATTAGCTTGTTGGTGGGGTAACGGCTCACCAAGGCGACGATCCCTAGCTGGTCTGAGAGGATGACCAGCCACACTGGAACTGAGACACGGTCCAGACTCCTACGGGAGGCAGCAGTGGGGAATATTGCACAATGGGCGCAAGCCTGATGCAGCCATGCCGCGTGTATGAAGAAGGCCTTCGGGTTGTAAAGTACT…	1
	H12	CGGGGGGGGGGCTAACACATGCAGTCGAGCGGCAGCGGGAAAGTAGCTTGCTACTTTTGCCGGCGAGCGGCGGACGGGTGAGTAATGCCTGGGGATCTGCCCAGTCGAGGGGGATAACTACTGGAAACGGTAGCTAATACCGCATACGCCCTACGGGGGAAAGCAGGGGACCTTCGGGCCTTGCGCGATTGGATGAACCCAGGTGGGATTAGCTAGTTGGTGAGGTAATGGCTCACCAAGGCGACGATCCCTAGCTGGTCTGAGAGGATGATCAGCCACACTGGAACTGAGACACGGTCCAGACTCCTACGGGAGGCAGCAGTGGGGAATATTGCACAATGGGGGAAACCCTGATGCAGCCATGCCGCGTGTGTGAAGAAGGCCTTCGGGTTGTAAAGC…	1
	H13	CGTGGGGGGGGGGCTACACATGCAGTCGACGGTAGCACAGAGAGCTTGCTCTCGGGTGACGAGTGGCGGACGGGTGAGTAATGTCTGGGAAACTGCCTGATGGAGGGGGATAACTACTGGAAACGGTAGCTAATACCGCATAACGTCGCAAGACCAAAGAGGGGGACCTTCGGGCCTCTTGCCATCAGATGTGCCCAGATGGGATTAGCTAGTAGGTGGGGTAACGGCTCACCTAGGCGACGATCCCTAGCTGGTCTGAGAGGATGACCAGCCACACTGGAACTGAGACACGGTCCAGACTCCTACGGGAGGCAGCAGTGGGGAATATTGCACAATGGGCGCAAGCCTGATGCAGCCATGCCGCGTGTATGAAGAAGGCCTTCGGGTTGTAAAGTACTT…	1
	H14	CGGGGGGGGGGGGCTACACATGCAAGTCGAGCGGCAGCGGGAAAGTAGCTTGCTACTTTTGCCGGCGAGCGGCGGACGGGTGAGTAATGCCTGGGGATCTGCCCAGTCGAGGGGGATAACTACTGGAAACGGTAGCTAATACCGCATACGCCCTACGGGGGAAAGCAGGGGACCTTCGGGCCTTGCGCGATTGGATGAACCCAGGTGGGATTAGCTAGTTGGTGAGGTAATGGCTCACCAAGGCGACGATCCCTAGCTGGTCTGAGAGGATGATCAGCCACACTGGAACTGAGACACGGTCCAGACTCCTACGGGAGGCAGCAGTGGGGAATATTGCACAATGGGGGAAACCCTGATGCAGCCATGCCGCGTGTGTGAAGAAGGCCTTCGGGTTGTAAA…	1
	H15	CGTGGGGGGGGCTAACCATGCAAGTCGAACGGTAACAGGAAGAAGCTTGCTTCTTTGCTGACGAGTGGCGGACGGGTGAGTAATGTCTGGGAAACTGCCTGATGGAGGGGGATAACTACTGGAAACGGTAGCTAATACCGCATAACGTCGCAAGACCAAAGAGGGGGACCTTCGGGCCTCTTGCCATCGGATGTGCCCAGATGGGATTAGCTAGTAGGTGGGGTAACGGCTCACCTAGGCGACGATCCCTAGCTGGTCTGAGAGGATGACCAGCCACACTGGAACTGAGACACGGTCCAGACTCCTACGGGAGGCAGCAGTGGGGAATATTGCACAATGGGCGCAAGCCTGATGCAGCCATGCCGCGTGTATGAAGAAGGCCTTCGGGTTGTAAAGTAC…	1
	H16	GGGGGGGGGCTAACACATGCAAGTCGAGCGGTAGCACAGAGAGCTTGCTCTCGGGTGACGAGCGGCGGACGGGTGAGTAATGTCTGGGAAACTGCCTGATGGAGGGGGATAACTACTGGAAACGGTAGCTAATACCGCATAACGTCGCAAGACCAAAGTGGGGGACCTTCGGGCCTCATGCCATCAGATGTGCCCAGATGGGATTAGCTAGTAGGTGGGGTAATGGCTCACCTAGGCGACGATCCCTAGCTGGTCTGAGAGGATGACCAGCCACACTGGAACTGAGACACGGTCCAGACTCCTACGGGAGGCAGCAGTGGGGAATATTGCACAATGGGCGCAAGCCTGATGCAGCCATGCCGCGTGTATGAAGAAGGCCTTCGGGTTGTAAAGTACTTT…	1
	H17	AGGGGGGGGGAGACTAACACATGCAAGTCGAGCGGCAGCGGGAAAGTAGCTTGCTACTTTTGCCGGCGAGCGGCGGACGGGTGAGTAATGCCTGGGGATCTGCCCAGTCGAGGGGGATAACTACTGGAAACGACTGCTAATACCGCATACGCCCTACGGGGGAAAGCAGGGGACCTTCGGGCCTTGCGCGATTGGATGTGCCCAGGTGGGATTAGCTAGTTGGTGAGGTAATGGCTCACCAAGGCGACGATCCCTAGCTGGTCTGAGAGGATGATCAGCCACACTGGAACTGAGACACGGTCCAGACTCCTACGGGAGGCAGCAGTGGGGAATATTGCACAATGGGGGAAACCCTGATGCAGCCATGCCGCGTGTGTGAAGAAGGCCTTCGGGTTGTAA…	1
	H18	TGGGGGGGGGACTACCATGCAGTCGAGCGGCAGCGGGAAAGTAGCTTGCTACTTTTGCCGGCGAGCGGCGGACGGGTGAGTAATGCCTGGGGATCTGCCCAGTCGAGGGGGATAACTACTGGAAACGGTAGCTAATACCGCATACGCCCTACGGGGGAAAGCAGGGGACCTTCGGGCCTTGCGCGATTGGATGAACCCAGGTGGGATTAGCTAGTTGGTGAGGTAATGGCTCACCAAGGCGACGATCCCTAGCTGGTCTGAGAGGATGATCAGCCACACTGGAACTGAGACACGGTCCAGACTCCTACGGGAGGCAGCAGTGGGGAATATTGCACAATGGGGGAAACCCTGATGCAGCCATGCCGCGTGTGTGAAGAAGGCCTTCGGGTTGTAAAGCAC…	1
	H19	CGGGGGGGGGGCTACACATGCAAGTCGACGGTAACAGGAAACAGCTTGCTGTTTCGCTGACGAGTGGCGGACGGGTGAGTAATGTCTGGGAAACTGCCTGATGGAGGGGGATAACTACTGGAAACGGTAGCTAATACCGCATAACGTCGCAAGACCAAAGAGGGGGACCTTCGGGCCTCTTGCCATCGGATGTGCCCAGATGGGATTAGCTTGTTGGTGGGGTAACGGCTCACCAAGGCGACGATCCCTAGCTGGTCTGAGAGGATGACCAGCCACACTGGAACTGAGACACGGTCCAGACTCCTACGGGAGGCAGCAGTGGGGAATATTGCACAATGGGCGCAAGCCTGATGCAGCCATGCCGCGTGTATGAAGAAGGCCTTCGGGTTGTAAAGTACT…	1
	H20	GGGGGGGGGCTAACACATGCAAGTCGAGCGGCAGCGGGAAAGTAGCTTGCTACTTTTGCCGGCGAGCGGCGGACGGGTGAGTAATGCCTGGGGATCTGCCCAGTCGAGGGGGATAACAGTTGGAAACGACTGCTAATACCGCATACGCCCTACGGGGGAAAGCAGGGGACCTTCGGGCCTTGCGCGATTGGATGAACCCAGGTGGGATTAGCTAGTTGGTGAGGTAATGGCTCACCAAGGCGACGATCCCTAGCTGGTCTGAGAGGATGATCAGCCACACTGGAACTGAGACACGGTCCAGACTCCTACGGGAGGCAGCAGTGGGGAATATTGCACAATGGGGGAAACCCTGATGCAGCCATGCCGCGTGTGTGAAGAAGGCCTTCGGGTTGTAAAGCA…	1
	H21	CGGGGGGGGGGCTAATACATGCAGTCGAGCGAACGGACGAGAGTGCTTGCACTCTCTGACGTTAGCGGCGGACGGGTGAGTAACACGTGGGTAACCTACCTATAAGACTGGGATAACTTCGGGAAACCGGAGCTAATACCGGATAATATCTAGCTTCGCATGAAGCGATAGTGAAAGACGGTTCTGCTGTCACTTATAGATGGACCCGCGGTGTATTAGCTAGTTGGTGAGGTAACGGCTCACCAAGGCAACGATACATAGCCGACCTGAGAGGGTGATCGGCCACACTGGGACTGAGACACGGCCCAGACTCCTACGGGAGGCAGCAGTAGGGAATCTTCCGCAATGGACGAAAGTCTGACGGAGCAACGCCGCGTGAGTGAAGAAGGTTTTCGGATC…	1
	H22	GGGGGGGGGCCTATACATGCAGTCGAGCGAATGACGAGAAGCTTGCTTCTCTGATTTAGCGGCGGACGGGTGAGTAACACGTGGGCAACCTGCCCTACAGATTGGGATAACTCAGGGAAACCTGGGCTAATACCGAATAATCCTTCGAATCACATGTTTTGAAGTTGAAAGGCGCTTCGGCGTCACTGTAGGATGGGCCCGCGGTGCATTAGCTAGTTGGTGGGGTAACGGCCTACCAAGGCAACGATGCATAGCCGACCTGAGAGGGTGATCGGCCACATTGGGACTGAGACACGGCCCAAACTCCTACGGGAGGCAGCAGTAGGGAATCTTCCACAATGGACGAAAGTCTGATGGAGCAACGCCGCGTGAGTGATGAAGGTTTTCGGATCGTAAAAC…	1
	H23	AGGGGGGGGGGCTATACATGCAAGTCGAGCGACGGACGAGAGTGCTTGCACTCTCTGATGTTAGCGGCGGACGGGTGAGTAACACGTGGGTAACCTACCTATAAGACTGGGATAACTTCGGGAAACCGGAGCTAATACCGGATAATATTTAGCTTCGCATGAAGCAATAGTGAAAGACGGTTCTGCTGTCACTTATAGATGGACCCGCGGTGTATTAGCTAGTTGGTGAGGTAACGGCTCACCAAGGCAACGATACATAGCCGACCTGAGAGGGTGATCGGCCACACTGGGACTGAGACACGGCCCAGACTCCTACGGGAGGCAGCAGTAGGGAATCTTCCGCAATGGACGAAAGTCTGACGGAGCAACGCCGCGTGAGTGAAGAAGGTTTTCGGATCG…	1
	H24	CGTGGGGGGGTGCTATACATGCAAGTCGAGCGACGGACGAGAGTGCTTGCACTCTCTGACGTTAGCGGCGGACGGGTGAGTAACACGTGGGTAACCTACCTATAAGACTGGGATAACTTCGGGAAACCGGAGCTAATACCGGATAATATCTAGCTTCGCATGAAGCGATAGTGAAAGACGGTTCTGCTGTCACTTATAGATGGACCCGCGGTGTATTAGCTAGTTGGTGAGGTAACGGCTCACCAAGGCAACGATACATAGCCGACCTGAGAGGGTGATCGGCCACACTGGGACTGAGACACGGCCCAGACTCCTACGGGAGGCAGCAGTAGGGAATCTTCCGCAATGGACGAAAGTCTGACGGAGCAACGCCGCGTGAGTGAAGAAGGTTTTCGGATC…	1
	H25	CTGGGGGGGGCTATACATGCAGTCGAGCGAATGACAGAGAAGCTTGCTTCTCTTGATTTAGCGGCGGACGGGTGAGTAACACGTGGGCAACCTACCTTATAGATGGGGATAACTCCGGGAAACCGGGGCTAATACCGAATAACTCCAAGCACCTCCTGGTGCTTGGCTGAAAGACGGCTTCGGCTGTCACTATAAGATGGGCCCGCGGCGCATTAGCTAGTTGGTAAGGTAACGGCTTACCAAGGCAACGATGCGTAGCCGACCTGAGAGGGTGATCGGCCACACTGGGACTGAGACACGGCCCAGACTCCTACGGGAGGCAGCAGTAGGGAATCTTCCACAATGGACGAAAGTCTGATGGAGCAACGCCGCGTGAGTGAAGAAGGTTTTCGGATCGTA…	1
	H26	TGGGGGGGGGCTATACATGCAGTCGAGCGAATGACAGAGAAGCTTGCTTCTCTTGATTTAGCGGCGGACGGGTGAGTAACACGTGGGCAACCTACCTTATAGATGGGGATAACTCCGGGAAACCGGGGCTAATACCGAATAACTCCAAGCACCTCCTGGTGCTTGGCTGAAAGACGGCTTCGGCTGTCACTATAAGATGGGCCCGCGGCGCATTAGCTAGTTGGTAAGGTAACGGCTTACCAAGGCAACGATGCGTAGCCGACCTGAGAGGGTGATCGGCCACACTGGGACTGAGACACGGCCCAGACTCCTACGGGAGGCAGCAGTAGGGAATCTTCCACAATGGACGAAAGTCTGATGGAGCAACGCCGCGTGAGTGAAGAAGGTTTTCGGATCGTA…	1
	H27	GGGGGGGGGCTATACATGCAGTCGAGCGAACGGACGAGAGTGCTTGCACTCTCTGAAGTTAGCGGCGGACGGGTGAGTAACACGTGGGTAACCTACCTATAAGACTGGGATAACTTCGGGAAACCGGAGCTAATACCGGATAATATTTAGCTTCGCATGAAGCAATAGTGAAAGACGGTTCTGCTGTCACTTATAGATGGACCCGCGGTGTATTAGCTAGTTGGTGAGGTAACGGCTCACCAAGGCAACGATACATAGCCGACCTGAGAGGGTGATCGGCCACACTGGGACTGAGACACGGCCCAGACTCCTACGGGAGGCAGCAGTAGGGAATCTTCCGCAATGGACGAAAGTCTGACGGAGCAACGCCGCGTGAGTGAAGAAGGTTTTCGGATCGTA…	1
	H28	CTGGGGGGGGGGGCCTATACATGCAAGTCGAGCGAATGACAGAGAAGCTTGCTTCTCTTGATTTAGCGGCGGACGGGTGAGTAACACGTGGGCAACCTACCTTATAGATGGGGATAACTCCGGGAAACCGGGGCTAATACCGAATAACTCCAAGCACCTCCTGGTGCTTGGCTGAAAGACGGCTTCGGCTGTCACTATAAGATGGGCCCGCGGCGCATTAGCTAGTTGGTAAGGTAACGGCTTACCAAGGCAACGATGCGTAGCCGACCTGAGAGGGTGATCGGCCACACTGGGACTGAGACACGGCCCAGACTCCTACGGGAGGCAGCAGTAGGGAATCTTCCACAATGGACGAAAGTCTGATGGAGCAACGCCGCGTGAGTGAAGAAGGTTTTCGGA…	1
	H29	CGGGGGGGGGGCTAACACATGCAGTCGAGCGGTAGCACAGAGAGCTTGCTCTCGGGTGACGAGCGGCGGACGGGTGAGTAATGTCTGGGAAACTGCCTGATGGAGGGGGATAACTACTGGAAACGGTAGCTAATACCGCATAATGTCGCAAGACCAAAGTGGGGGACCTTCGGGCCTCATGCCATCAGATGTGCCCAGATGGGATTAGCTAGTAGGTGGGGTAACGGCTCACCTAGGCGACGATCCCTAGCTGGTCTGAGAGGATGACCAGCCACACTGGAACTGAGACACGGTCCAGACTCCTACGGGAGGCAGCAGTGGGGAATATTGCACAATGGGCGCAAGCCTGATGCAGCCATGCCGCGTGTATGAAGAAGGCCTTCGGGTTGTAAAGTACTT…	1
	H30	CGGGGGGGGGGAGGCTACACATGCAGTCGAGCGGTAGCACAGAGAGCTTGCTCTCGGGTGACGAGCGGCGGACGGGTGAGTAATGTCTGGGAAACTGCCTGATGGAGGGGGATAACTACTGGAAACGGTAGCTAATACCGCATAATGTCGCAAGACCAAAGTGGGGGACCTTCGGGCCTCATGCCATCAGATGTGCCCAGATGGGATTAGCTAGTAGGTGGGGTAACGGCTCACCTAGGCGACGATCCCTAGCTGGTCTGAGAGGATGACCAGCCACACTGGAACTGAGACACGGTCCAGACTCCTACGGGAGGCAGCAGTGGGGAATATTGCACAATGGGCGCAAGCCTGATGCAGCCATGCCGCGTGTATGAAGAAGGCCTTCGGGTTGTAAAGTAC…	1
	H31	CGGGGGGGGGGGGCTAATACTGCAGTCGAGCGAATGACGAGAAGCTTGCTTCTCTGATTTAGCGGCGGACGGGTGAGTAACACGTGGGCAACCTGCCCTACAGATCGGGATAACTCAGGGAAACCTGGGCTAATACCGGATAATCCTTCGAATCACATGTTTTGAAGTTGAAAGGCGCTTCGGCGTCACTGTAGGATGGGCCCGCGGTGCATTAGCTAGTTGGTGGGGTAACGGCCTACCAAGGCAACGATGCATAGCCGACCTGAGAGGGTGATCGGCCACATTGGGACTGAGACACGGCCCAAACTCCTACGGGAGGCAGCAGTAGGGAATCTTCCACAATGGACGAAAGTCTGATGGAGCAACGCCGCGTGAGTGATGAAGGTTTTCGGATCGTAA…	1
	H32	CGGGGGGGGGGGCTAATACATGCAGTCGAGCGAACGGACGAGAGTGCTTGCACTCTCTGATGTTAGCGGCGGACGGGTGAGTAACACGTGGGTAACCTACCTATAAGACTGGGATAACTTCGGGAAACCGGAGCTAATACCGGATAATATTTAGCTTCGCATGAAGCAATAGTGAAAGACGGTTCTGCTGTCACTTATAGATGGACCCGCGGTGTATTAGCTAGTTGGTGAGGTAACGGCTCACCAAGGCAACGATACATAGCCGACCTGAGAGGGTGATCGGCCACACTGGGACTGAGACACGGCCCAGACTCCTACGGGAGGCAGCAGTAGGGAATCTTCCGCAATGGACGAAAGTCTGACGGAGCAACGCCGCGTGAGTGAAGAAGGTTTTCGGAT…	1
	H33	TGGCTCCAGGCTTACACATGCAAGTCGAGCGGGGATAGGGTGCTTGCACCTGATTCCTAGCGGCGGACGGGTGAGTAATGCTTAGGAATCTGCCTATTAGTGGGGGACAACATTCCGAAAGGGATGCTAATACCGCATACGTCCTACGGGAGAAAGCAGGGGATCTTCGGACCTTGCGCTAATATATGAGCCTAAGTCGGATTAGCTAGTTGGTGGGGTAAAGGCCTACCAAGGCGACGATCTGTAGCGGGTCTGAGAGGATGATCCGCCACACTGGGACTGAGACACGGCCCAGACTCCTACGGGAGGCAGCAGTGGGGAATATTGGACAATGGGGGGAACCCTGATCCACCCATGCCGCGTGTGTGAAGAAGGCCTTTTGGTTGTAAAGCACTTTAA…	1
	H34	CGCTCGTGACTTTAACGTCATTGGACAGTTAGCATCTAGACAATGTATGAGTCATCCGCTCTCGGTGTACGCAGTTCCTAGAGTCCAACTATGTGCACTAGACATGATGCTCGTGCGGACTTATCCACATTCAGACCGAGCTGACGACACCATGCACCACTGTCACCCTGCCCCGAGGGAGTACATCTCTGTACGTCAGGGGATTCAGAGTGTAGGTTCTCGCGTTGCTCGATAACACATGCTCCACGCTGTGCGGGTCCCCGTCAATTCCTTTGGAGTTCAGCCTGGGACCGTATTCCCCAGCGGGAGTGCTTATGGGTAGCTTCAGCACGGAAGGCGGAACCTCCAACCCTAGCCTTCATCGTTTACGGGGTGATTCCCAGGGTTTTAATCTGTTTG…	1
	H35	GGGGGCGGGCTATACTGCAGTCGAGCGAACGGACGAGAGTGCTTGCACTCTCTGATGTTAGCGGCGGACGGGTGAGTAACACGTGGGTAACCTACCTATAAGACTGGGATAACTTCGGGAAACCGGAGCTAATACCGGATAATATTTAACTTCGCATGAAGCAATAGTGAAAGACGGTTCTGCTGTCACTTATAGATGGACCCGCGGTGTATTAGCTAGTTGGTGAGGTAACGGCTCACCAAGGCAACGATACATAGCCAACCTGAGAGGGTGATCGGCCACACTGGGACTGATACACGGCCCAGACTCCTACGGGAGGCAGCAATAGGGAATCTTCCGCAATGGACGAAAGTCTGACGGAGCAACGCCGCGTGAGTGAAGAAGGTTTTCTGATCGTAA…	1
	H36	GGGGGGGGGGCTAACACATGCAAGTCGAGCGGCAGCGGGAAAGTAGCTTGCTACTTTTGCCGGCGAGCGGCGGACGGGTGAGTAATGCCTGGGGATCTGCCCAGTCGAGGGGGATAACTACTGGAAACGGTAGCTAATACCGCATACGCCCTACGGGGGAAAGCAGGGGACCTTCGGGCCTTGCGCGATTGGATGAACCCAGGTGGGATTAGCTAGTTGGTGAGGTAATGGCTCACCAAGGCGACGATCCCTAGCTGGTCTGAGAGGATGATCAGCCACACTGGAACTGAGACACGGTCCAGACTCCTACGGGAGGCAGCAGTGGGGAATATTGCACAATGGGGGAAACCCTGATGCAGCCATGCCGCGTGTGTGAAGAAGGCCTTCGGGTTGTAAAGC…	1
	H37	GGGGGGGGGCTAATACATGCAAGTCGAGCGAACGGACGAGAGTGCTTGCACTCTCTGATGTTAGCGGCGGACGGGTGAGTAACACGTGGGTAACCTACCTATAAGACTGGGATAACTTCGGGAAACCGGAGCTAATACCGGATAATATCTAGCTTCGCATGAAGCGATAGTGAAAGACGGTTCTGCTGTCACTTATAGATGGACCCGCGGTGTATTAGCTAGTTGGTGAGGTAACGGCTCACCAAGGCAACGATACATAGCCGACCTGAGAGGGTGATCGGCCACACTGGGACTGAGACACGGCCCAGACTCCTACGGGAGGCAGCAGTAGGGAATCTTCCGCAATGGACGAAAGTCTGACGGAGCAACGCCGCGTGAGTGAAGAAGGTTTTCGGATCG…	1
	H38	TGGGGGGGCTTACACATGCAGTCGAGCGGGGAAAGGTAGCTTGCTACCTGACCTACCGGCGGACGGGTGAGTAATGCTTAGGAATCTGCCTATTAGTGGGGGACAACATCTCGAAAGGGATGCTAATACCGCATACGTCCTACGGGAGAAAGCAGGGGACCTTCGGGCCTTGCGCTAATAGATGAGCCTAAGTCGGATTAGCTAGTTGGTGGGGTAAAGGCCTACCAAGGCGACGATCTGTAGCGGGTCTGAGAGGATGATCCGCCACACTGGGACTGAGACACGGCCCAGACTCCTACGGGAGGCAGCAGTGGGGAATATTGGACAATGGGGGGAACCCTGATCCAGCCATGCCGCGTGTGTGAAGAAGGCCTTTTGGTTGTAAAGCACTTTAAGCGA…	1
	H39	CGGGGGGGGGGCTAACACATGCAGTCGAGCGGTAGCACAGAGAGCTTGCTCTCGGGTGACGAGCGGCGGACGGGTGAGTAATGTCTGGGAAACTGCCTGATGGAGGGGGATAACTACTGGAAACGGTAGCTAATACCGCATAATGTCGCAAGACCAAAGTGGGGGACCTTCGGGCCTCTTGCCATCAGATGTGCCCAGATGGGATTAGCTAGTAGGTGGGGTAACGGCTCACCTAGGCGACGATCCCTAGCTGGTCTGAGAGGATGACCAGCCACACTGGAACTGAGACACGGTCCAGACTCCTACGGGAGGCAGCAGTGGGGAATATTGCACAATGGGCGCAAGCCTGATGCAGCCATGCCGCGTGTATGAAGAAGGCCTTCGGGTTGTAAAGTACTT…	1
	H40	AGGGGGGGAGGCTACACATGCAGTCGAGCGGTAGCACAGAGAGCTTGCTCTCGGGTGACGAGCGGCGGACGGGTGAGTAATGTCTGGGAAACTGCCTGATGGAGGGGGATAACTACTGGAAACGGTAGCTAATACCGCATAATGTCGCAAGACCAAAGTGGGGGACCTTCGGGCCTCATGCCATCAGATGTGCCCAGATGGGATTAGCTAGTAGGTGGGGTAACGGCTCACCTAGGCGACGATCCCTAGCTGGTCTGAGAGGATGACCAGCCACACTGGAACTGAGACACGGTCCAGACTCCTACGGGAGGCAGCAGTGGGGAATATTGCACAATGGGCGCAAGCCTGATGCAGCCATGCCGCGTGTATGAAGAAGGCCTTCGGGTTGTAAAGTACTTT…	1
	H41	GGGGGGGGGGGGGGGGGCCTACACATGCAAGTCGAACGGTAACAGGAAGCAGCTTGCTGCTTCGCTGACGAGTGGCGGACGGGTGAGTAATGTCTGGGAAACTGCCTGATGGAGGGGGATAACTACTGGAAACGGTAGCTAATACCGCATAACGTCGCAAGACCAAAGAGGGGGACCTTCGGGCCTCTTGCCATCGGATGTGCCCAGATGGGATTAGCTAGTAGGTGGGGTAACGGCTCACCTAGGCGACGATCCCTAGCTGGTCTGAGAGGATGACCAGCCACACTGGAACTGAGACACGGTCCAGACTCCTACGGGAGGCAGCAGTGGGGAATATTGCACAATGGGCGCAAGCCTGATGCAGCCATGCCGCGTGTATGAAGAAGGCCTTCGGGTTGT…	1
	H42	TCGGGGGGGGGGGACTACACATGGCAGTCGAACGGTAACAGGAAGAAGCTTGCTGCTTTGCTGACGAGTGGCGGACGGGTGAGTAATGTCTGGGAAACTGCCTGATGGAGGGGGATAACTACTGGAAACGGTAGCTAATACCGCATAACGTCGCAAGACCAAAGAGGGGGACCTTCGGGCCTCTTGCCATCGGATGTGCCCAGATGGGATTAGCTTGTTGGTGGGGTAACGGCTCACCTAGGCGACGATCCCTAGCTGGTCTGAGAGGATGACCAGCCACACTGGAACTGAGACACGGTCCAGACTCCTACGGGAGGCAGCAGTGGGGAATATTGCACAATGGGCGCAAGCCTGATGCAGCCATGCCGCGTGTATGAAGAAGGCCTTCGGGTTGTAAAG…	1
	H43	CGGGGGGGGGGCTATACTGCAAGTCGAGCGATGACGAGAAGCTTGCTTCTCTGATTTAGCGGCGGACGGGTGAGTAACACGTGGGCAACCTGCCCTACAGATCGGGATAACTCAGGGAAACCTGGGCTAATACCGGATAATCCTTCGAATCACATGTTTTGAAGTTGAAAGGCGCTTCGGCGTCACTGTAGGATGGGCCCGCGGTGCATTAGCTAGTTGGTGGGGTAACGGCCTACCAAGGCAACGATGCATAGCCGACCTGAGAGGGTGATCGGCCACATTGGGACTGAGACACGGCCCAAACTCCTACGGGAGGCAGCAGTAGGGAATCTTCCACAATGGACGAAAGTCTGATGGAGCAACGCCGCGTGAGTGATGAAGGTTTTCGGATCGTAAAAC…	1
	H44	TGGGGGGGGGGGCTAATACATGCAAGTCGAGCGACAGACGAGAGTGCTTGCACTCTCTGATGTTAGCGGCGGACGGGTGAGTAACACGTGGGTAACCTACCTATAAGACTGGGATAACTTCGGGAAACCGGAGCTAATACCGGATAATATCTAGCTTCGCATGAAGCGATAGTGAAAGACGGTTCTGCTGTCACTTATAGATGGACCCGCGGTGTATTAGCTAGTTGGTGAGGTAACGGCTCACCAAGGCAACGATACATAGCCGACCTGAGAGGGTGATCGGCCACACTGGGACTGAGACACGGCCCAGACTCCTACGGGAGGCAGCAGTAGGGAATCTTCCGCAATGGACGAAAGTCTGACGGAGCAACGCCGCGTGAGTGAAGAAGGTTTTCGGAT…	1
	H45	TGGGGGGGGGGCTACACATGCAGTCGAACGGTAGCACGCAGGGAGCTTGCTGCTTGGGTGACGAGTGGCGGACGGGTGAGTAATGTCTGGGAAACTGCCTGATGGAGGGGGATAACTACTGGAAACGGTAGCTAATACCGCATAACGTCGCAAGACCAAAGAGGGGGACCTTCGGGCCTCTTGCCATCGGATGTGCCCAGATGGGATTAGCTAGTAGGTGGGGTAACGGCTCACCTAGGCGACGATCCCTAGCTGGTCTGAGAGGATGACCAGCCACACTGGAACTGAGACACGGTCCAGACTCCTACGGGAGGCAGCAGTGGGGAATATTGCACAATGGGCGCAAGCCTGATGCAGCCATGCCGCGTGTATGAAGAAGGCCTTCGGGTTGTAAAGTAC…	1
	H46	CTGGGGGGAGATACACATGCAGTCGAACGGTAGCACGAAGAAGCTTGCTCCTTGGCTGACGAGTGGCGGACGGGTGAGTAATGTCTGGGAAACTGCCTGATGGAGGGGGATAACTACTGGAAACGGTAGCTAATACCGCATAACGTCGCAAGACCAAAGAGGGGGACCTTCGGGCCTCTTGCCATCGGATGTGCCCAGATGGGATTAGCTAGTAGGTGGGGTAACGGCTCACCTAGGCGACGATCCCTAGCTGGTCTGAGAGGATGACCAGCCACACTGGAACTGAGACACGGTCCAGACTCCTACGGGAGGCAGCAGTGGGGAATATTGCACAATGGGCGCAAGCCTGATGCAGCCATGCCGCGTGTATGAAGAAGGCCTTCGGGTTGTAAAGTACTT…	1
	H47	CGGGGGGGCAGGCTACACATGCAAGTCGAACGGTAGCACAGAGAGCTTGCTCTCGGGTGACGAGTGGCGGACGGGTGAGTAATGTCTGGGAAACTGCCTGATGGAGGGGGATAACTACTGGAAACGGTAGCTAATACCGCATAACGTCGCAAGACCAAAGAGGGGGACCTTCGGGCCTCTTGCCATCAGATGTGCCCAGATGGGATTAGCTAGTAGGTGGGGTAACGGCTCACCTAGGCGACGATCCCTAGCTGGTCTGAGAGGATGACCAGCCACACTGGAACTGAGACACGGTCCAGACTCCTACGGGAGGCAGCAGTGGGGAATATTGCACAATGGGCGCAAGCCTGATGCAGCCATGCCGCGTGTATGAAGAAGGCCTTCGGGTTGTAAAGTACT…	1
	H48	CGGGCGGGAGACTACACATGCAGTCGTACCAAAAATACCCAAACAGCTTGCTGCTTCGCTGACGAGTGGCGGACGGGTGAGTAATGTCTGGGAAACTGCCTGATGGAGGGGGATAACTACTGGAAACGGTGGCTAATACCGCATAACGTCGCAAGACCAAAGAGGGGGACCTTCGGGCCTCTTGCCATCAGATGTGCCCAGATGGGATTAGCTTGTTGGTGAGGTAACGGCTCACCAAGGCGACGATCCCTAGCTGGTCTGAGAGGATGACCAGCCACACTGGAACTGAGACACGGTCCAGACTCCTACGGGAGGCAGCAGTGGGGAATATTGCACAATGGGCGCAAGCCTGATGCAGCCATGCCGCGTGTATGAAGAAGGCCTTCGGGTTGTAAAGTA…	1
	H49	AGGGGGGGGGGGCTACACATGCAGTCGAACGAGTAGCAGGCAGACAGCTTGCTGCTTCGCTGACGAGTGGCGGACGGGTGAGTAATGTCTGGGAAACTGCCTGATGGAGGGGGATAACTACTGGAAACGGTAGCTAATACCGCATAACGTCGCAAGACCAAAGAGGGGGACCTTCGGGCCTCTTGCCATCGGATGTGCCCAGATGGGATTAGCTAGTAGGTGGGGTAACGGCTCACCTAGGCGACGATCCCTAGCTGGTCTGAGAGGATGACCAGCCACACTGGAACTGAGACACGGTCCAGACTCCTACGGGAGGCAGCAGTGGGGAATATTGCACAATGGGCGCAAGCCTGATGCAGCCATGCCGCGTGTATGAAGAAGGCCTTCGGGTTGTAAAGT…	1
	H50	CGGGGGGGGGCTACACATGCAGTCGAACGGTAGCAGGCAGACAGCTTGCTGCTTCGCTGACGAGTGGCGGACGGGTGAGTAATGTCTGGGAAACTGCCTGATGGAGGGGGATAACTACTGGAAACGGTAGCTAATACCGCATAACGTCGCAAGACCAAAGAGGGGGACCTTCGGGCCTCTTGCCATCGGATGTGCCCAGATGGGATTAGCTTGTAGGTGGGGTAACGGCTCACCTAGGCGACGATCCCTAGCTGGTCTGAGAGGATGACCAGCCACACTGGAACTGAGACACGGTCCAGACTCCTACGGGAGGCAGCAGTGGGGAATATTGCACAATGGGCGCAAGCCTGATGCAGCCATGCCGCGTGTATGAAGAAGGCCTTCGGGTTGTAAAGTACT…	1
	H51	GGGTGGGGGGGGGCTACACATGCAGTCGACGGTAGCACAGAGAGCTTGCTCTCGGGTGACGAGTGGCGGACGGGTGAGTAATGTCTGGGAAACTGCCTGATGGAGGGGGATAACTACTGGAAACGGTAGCTAATACCGCATAACGTCGCAAGACCAAAGAGGGGGACCTTCGGGCCTCTTGCCATCAGATGTGCCCAGATGGGATTAGCTAGTAGGTGGGGTAATGGCTCACCTAGGCGACGATCCCTAGCTGGTCTGAGAGGATGACCAGCCACACTGGAACTGAGACACGGTCCAGACTCCTACGGGAGGCAGCAGTGGGGAATATTGCACAATGGGCGCAAGCCTGATGCAGCCATGCCGCGTGTATGAAGAAGGCCTTCGGGTTGTAAAGTACTT…	1
	H52	CTGGGGGGGGGGCTACACATGCAGTCGAACGGTAGCACAGAGGAGCTTGCTCCTTGGGTGACGAGTGGCGGACGGGTGAGTAATGTCTGGGAAACTGCCCGATGGAGGGGGATAACTACTGGAAACGGTAGCTAATACCGCATAACGTCGCAAGACCAAAGAGGGGGACCTTCGGGCCTCTTGCCATCGGATGTGCCCAGATGGGATTAGCTAGTAGGTGGGGTAACGGCTCACCTAGGCGACGATCCCTAGCTGGTCTGAGAGGATGACCAGCCACACTGGAACTGAGACACGGTCCAGACTCCTACGGGAGGCAGCAGTGGGGAATATTGCACAATGGGCGCAAGCCTGATGCAGCCATGCCGCGTGTATGAAGAAGGCCTTCGGGTTGTAAAGTAC…	1
	H53	TGGGGGGGGCTAATACATGCAGTCGAGCGAATGACGAGAAGCTTGCTTCTCTGATTTAGCGGGGGACGGGTGAGTAACACGTGGGCAACCTGCCCTACTGATCGGGATAACTCACGGAAACCTGGGCTAATACCGGATAATCCTTCGAATCACATGTTTTGAAATTGAAAGGCGCTTCGGCGTCACTGGAGGATGGGCCCGCGGTGCATTAACTAGTTGGTGGGGTAACGGCCTACCAAGGCAACTATGCATACCCAACCTGAGAGGGTGATCGGCCACATTGGGACTGAGACACGGCCCATACTCCTACGGGAGGCAGCAATAAGGAATCTTCCACAATGGACCAAAGTCTGATGGAGCAACGCCGCGTGAATGATGAAAGTTTTCGGATCGTAAAAC…	1
	H54	CGGGGGGGGGGTGCTAATACATGCAGTCGAGCGAATGACGAGAAGCTTGCTTCTCTGATTTAGCGGCGGACGGGTGAGTAACACGTGGGCAACCTGCCCTACAGATTGGGATAACTCAGGGAAACCTGGGCTAATACCGAATAATCCTTCGAATCACATGTTTTGAAGTTGAAAGGCGCTTCGGCGTCACTGTAGGATGGGCCCGCGGTGCATTAGCTAGTTGGTGGGGTAACGGCCTACCAAGGCAACGATGCATAGCCGACCTGAGAGGGTGATCGGCCACATTGGGACTGAGACACGGCCCAAACTCCTACGGGAGGCAGCAGTAGGGAATCTTCCACAATGGACGAAAGTCTGATGGAGCAACGCCGCGTGAGTGATGAAGGTTTTCGGATCGTA…	1
	H55	CGGGGGGGCGGGCTACACATGCAGTCGAGCGGCAGCACAAGGGAGTTTACTCCTGAGGTGGCGAGCGGCGGACGGGTGAGTAATGCCTAGGGATCTGCCCAGTCGAGGGGGATAACAGTTGGAAACGACTGCTAATACCGCATACGCCCTACGGGGGAAAGAGGGGGACCTTCGGGCCTCTCGCGATTGGATGAACCTAGGTGGGATTAGCTAGTTGGTGAGGTAATGGCTCACCAAGGCGACGATCCCTAGCTGTTCTGAGAGGATGATCAGCCACACTGGGACTGAGACACGGCCCAGACTCCTACGGGAGGCAGCAGTGGGGAATATTGCACAATGGGGGAAACCCTGATGCAGCCATGCCGCGTGTGTGAAGAAGGCCTTCGGGTTGTAAAGCAC…	1
	H56	AGGGGGGGGGGCTAACACATGCAAGTCGAGCGGTAACAGGAAGAATCTTGCTTCTTTGCTGACGAGCGGCGGACGGGTGAGTAATGTATGGGGATCTGCCTGACAGAGGGGGATAACTACTGGAAACGGTAGCTAATACCGCATAATCTCTAAGGAGCGAAGCAGGGGACCTTCGGGCCTTGCGCTGTCTGATGAACCCATATGGGATTAGCTAGTAAGTGAGGGAATGGCTCACCTACGCGACGATCTCTAGCTGGTCTGACAGGATGATCAGCCACACTGGGACTGAGACACAGCCCAGACTCCTACGGGAGGCAGCACTGGGGAATATTGCACAATGGGCGCAAGCCTGATGCATCCATGCCGCGTGTATGAAGAAGGCCTTATGGTTGTAAAGTA…	1
	H57	GCGGGGGGGGAGGCTAACACATGCAAGTCGAGCGGCAGCGGGAAAGTAGCTTGCTACTTTTGCCGGCGAGCGGCGGACGGGTGAGTAATGCCTGGGAAATTGCCCAGTCGAGGGGGATAACAGTTGGAAACGACTGCTAATACCGCATACGCCCTACGGGGGAAAGCAGGGGACCTTCGGGCCTTGCGCGATTGGATATGCCCAGGTGGGATTAGCTTGTTGGTGAGGTAATGGCTCACCAAGGCGACGATCCCTAGCTGGTCTGAGAGGATGATCAGCCACACTGGAACTGAGACACGGTCCAGACTCCTACGGGAGGCAGCAGTGGGGAATATTGCACAATGGGGGAAACCCTGATGCAGCCATGCCGCGTGTGTGAAGAAGGCCTTCGGGTTGTAA…	1
	H58	AGGGGGGGGAGGCCTATACTGCAGTCGAGCGATGACAGAGAAGCTTGCTTCTCTTGATTTAGCGGCGGACGGGTGAGTAACACGTGGGCAACCTACCTTATAGATGGGGATAACTCCGGGAAACCGGGGCTAATACCGAATAACTCCAAGCACCTCCTGGTGCTTGGCTGAAAGACGGCTTCGGCTGTCACTATAAGATGGGCCCGCGGCGCATTAGCTAGTTGGTAAGGTAACGGCTTACCAAGGCAACGATGCGTAGCCGACCTGAGAGGGTGATCGGCCACACTGGGACTGAGACACGGCCCAGACTCCTACGGGAGGCAGCAGTAGGGAATCTTCCACAATGGACGAAAGTCTGATGGAGCAACGCCGCGTGAGTGAAGAAGGTTTTCGGATCGT…	1
	H59	CGGGGGGGTGCTATACATGCAGTCGAGCGACGGACGAGAGTGCTTGCACTCTCTGAAGTTAGCGGCGGACGGGTGAGTAACACGTGGGTAACCTACCTATAAGACTGGGATAACTTCGGGAAACCGGAGCTAATACCGGATAATATTTAGCTTCGCATGAAGCAATAGTGAAAGACGGTTCTGCTGTCACTTATAGATGGACCCGCGGTGTATTAGCTAGTTGGTGAGGTAACGGCTCACCAAGGCAACGATACATAGCCGACCTGAGAGGGTGATCGGCCACACTGGGACTGAGACACGGCCCAGACTCCTACGGGAGGCAGCAGTAGGGAATCTTCCGCAATGGACGAAAGTCTGACGGAGCAACGCCGCGTGAGTGAAGAAGGTTTTCGGATCGTA…	1
	H60	TGGGGGGGGGGTGGCCTAATACTGCAAGGTCGAGCGAATGACGAGAAGCTTGCTTCTCTGATTTAGCGGCGGACGGGTGAGTAACACGTGGGCAACCTGCCCTACAGATCGGGATAACTCAGGGAAACCTGGGCTAATACCGGATAATCCTTCGAATCACATGTTTTGAAGTTGAAAGGCGCTTCGGCGTCACTGTAGGATGGGCCCGCGGTGCATTAGCTAGTTGGTGGGGTAACGGCCTACCAAGGCAACGATGCATAGCCGACCTGAGAGGGTGATCGGCCACATTGGGACTGAGACACGGCCCAAACTCCTACGGGAGGCAGCAGTAGGGAATCTTCCACAATGGACGAAAGTCTGATGGAGCAACGCCGCGTGAGTGATGAAGGTTTTCGGATC…	1
	H61	AGGCGGGGTGCTAATACATGCAGTCGAGCGACGGACGAGAGTGCTTGCACTCTCTGATGTTAGCGGCGGACGGGTGAGTAACACGTGGGTAACCTACCTATAAGACTGGGATAACTTCGGGAAACCGGAGCTAATACCGGATAATATTTAGCTTCGCATGAAGCAATAGTGAAAGACGGTTCTGCTGTCACTTATAGATGGACCCGCGGTGTATTAGCTAGTTGGTGAGGTAACGGCTCACCAAGGCAACGATACATAGCCGACCTGAGAGGGTGATCGGCCACACTGGGACTGAGACACGGCCCAGACTCCTACGGGAGGCAGCAGTAGGGAATCTTCCGCAATGGACGAAAGTCTGACGGAGCAACGTCGCGTGAGTGAAGAAGGTTTTCGGATCGT…	1
	H62	CGGGGGGGGGGGGCTAATACATGCAGTCGAGCGAATGACGAGAAGCTTGCTTCTCTGATTTAGCGGCGGACGGGTGAGTAACACGTGGGCAACCTGCCCTACAGATCGGGATAACTCAGGGAAACCTGGGCTAATACCGGATAATCCTTCGAATCACATGTTTTGAAGTTGAAAGGCGCTTCGGCGTCACTGTAGGATGGGCCCGCGGTGCATTAGCTAGTTGGTGGGGTAACGGCCTACCAAGGCAACGATGCATAGCCGACCTGAGAGGGTGATCGGCCACATTGGGACTGAGACACGGCCCAAACTCCTACGGGAGGCAGCAGTAGGGAATCTTCCACAATGGACGAAAGTCTGATGGAGCAACGCCGCGTGAGTGATGAAGGTTTTCGGATCGTA…	1
	H63	CGGTGGGGGGGCTACACATGCAGTCGAGCGGTAGCACAAGAGAGCTTGCTCTCTGGGTGACGAGCGGCGGACGGGTGAGTAATGTCTGGGAAACTGCCTGATGGAGGGGGATAACTACTGGAAACGGTAGCTAATACCGCATGATGTCTTCGGACCAAAGTGGGGGACCTTCGGGCCTCACGCCATCAGATGTGCCCAGATGGGATTAGCTAGTAGGTGGGGTAATGGCTCACCTAGGCGACGATCTCTAGCTGGTCTGAGAGGATGACCAGCCACACTGGAACTGAGACACGGTCCAGACTCCTACGGGAGGCAGCAGTGGGGAATATTGCACAATGGGCGCAAGCCTGATGCAGCCATGCCGCGTGTATGAAGAAGGCCTTCGGGTTGTAAAGTACT…	1
	H64	CGGGGGGGGGGGGGCTATACATGCAGTCGAGCGAATGACGAGAAGCTTGCTTCTCTGATTTAGCGGCGGACGGGTGAGTAACACGTGGGCAACCTGCCCTACAGATCGGGATAACTCAGGGAAACCTGGGCTAATACCGGATAATCCTTCGAATCACATGTTTTGAAGTTGAAAGGCGCTTCGGCGTCACTGTAGGATGGGCCCGCGGTGCATTAGCTAGTTGGTGGGGTAACGGCCTACCAAGGCAACGATGCATAGCCGACCTGAGAGGGTGATCGGCCACATTGGGACTGAGACACGGCCCAAACTCCTACGGGAGGCAGCAGTAGGGAATCTTCCACAATGGACGAAAGTCTGATGGAGCAACGCCGCGTGAGTGATGAAGGTTTTCGGATCGTA…	1
	H65	AGGGGGGGGCTATACATGCAGTCGAGCGAATGACGAGAAGCTTGCTTCTCTGATTTAGCGGCGGACGGGTGAGTAACACGTGGGCAACCTGCCCTACAGATCGGGATAACTCAGGGAAACCTGGGCTAATACCGGATAATCCTTCGAATCACATGTTTTGAAGTTGAAAGGCGCTTCGGCGTCACTGTAGGATGGGCCCGCGGTGCATTAGCTAGTTGGTGGGGTAACGGCCTACCAAGGCAACGATGCATAGCCGACCTGAGAGGGTGATCGGCCACATTGGGACTGAGACACGGCCCAAACTCCTACGGGAGGCAGCAGTAGGGAATCTTCCACAATGGACGAAAGTCTGATGGAGCAACGCCGCGTGAGTGATGAAGGTTTTCGGATCGTAAAACT…	1
	H66	CGGGGGCGGGGGGGGCTACACATGCAGTCGAGCGGCAGCGGGAAAGTAGCTTGCTACTTTTGCCGGCGAGCGGCGGACGGGTGAGTAATGCCTGGGGATCTGCCCAGTCGAGGGGGATAACAGTTGGAAACGACTGCTAATACCGCATACGCCCTACGGGGGAAAGCAGGGGACCTTCGGGCCTTGCGCGATTGGATGAACCCAGGTGGGATTAGCTAGTTGGTGAGGTAATGGCTCACCAAGGCGACGATCCCTAGCTGGTCTGAGAGGATGATCAGCCACACTGGAACTGAGACACGGTCCAGACTCCTACGGGAGGCAGCAGTGGGGAATATTGCACAATGGGGGAAACCCTGATGCAGCCATGCCGCGTGTGTGAAGAAGGCCTTCGGGTTGTAA…	1
	H67	CGGGGGGGGGAGGGCTACACATGCAGTCGAGCGGTAGCACAGAGAGCTTGCTCTCGGGTGACGAGCGGCGGACGGGTGAGTAATGTCTGGGAAACTGCCTGATGGAGGGGGATAACTACTGGAAACGGTAGCTAATACCGCATAACGTCGCAAGACCAAAGAGGGGGACCTTCGGGCCTCTTGCCATCAGATGTGCCCAGATGGGATTAGCTAGTAGGTGGGGTAACGGCTCACCTAGGCGACGATCCCTAGCTGGTCTGAGAGGATGACCAGCCACACTGGAACTGAGACACGGTCCAGACTCCTACGGGAGGCAGCAGTGGGGAATATTGCACAATGGGCGCAAGCCTGATGCAGCCATGCCGCGTGTATGAAGAAGGCCTTCGGGTTGTAAAGTAC…	1
	H68	CGGGGGGACTAATACATGCAGTCGAGCGCAGGAAGCCGTCTGAACCCTTCGGGGGGACGACGGTGGAATGAGCGGCGGACGGGTGAGTAACACGTAAAGAACCTGCCCATAGGTCTGGGATAACCACGAGAAATCGGGGCTAATACCGGATGTGTCATCGGACCGCATGGTCCGCTGATGAAAGGCGCTCCGGCGTCGCCCATGGATGGCTTTGCGGTGCATTAGCTAGTTGGTGGGGTAACGGCCCACCAAGGCGACGATGCATAGCCGACCTGAGAGGGTGATCGGCCACACTGGGACTGAGACACGGCCCAGACTCCTACGGGAGGCAGCAGTAGGGAATCTTCCACAATGGACGAAAGTCTGATGGAGCAACGCCGCGTGAACGATGAAGGCTTT…	1
	H69	CGGGGGGGGGCTAATACTGCAGTCGAGCGAACGGACGAGAGTGCTTGCACTCTCTGATGTTAGCGGCGGACGGGTGAGTAACACGTGGGTAACCTACCTATAAGACTGGGATAACTTCGGGAAACCGGAGCTAATACCGGATAATATCTAACTTCGCATGAAGCGATAGTGAAAGACGGTTCTGCTGTCACTTATACATGGACCCGCGGTGTATTAGCTAATTGGTGAGGTAACGGCTCACCAAAGCAACGATACATATCCGACCTGAAAGGGTGATCGGGCACACTGGGACTGAGACACAGTCCAAACTCCTACGGGAGGGAGCACTATGGAATCTTCCGCAATGGACTAAAGTCTGACTGACCAACGCCGCGTGAGTGAATAAGGTTTTCGGATCGT…	1
	H70	AGGGGGGGGGGTGCCTAATACATGCAAGTCGAGCGAATGACGAGAAGCTTGCTTCTCTGATTTAGCGGCGGACGGGTGAGTAACACGTGGGCAACCTGCCCTACAGATCGGGATAACTCAGGGAAACCTGGGCTAATACCGGATAATCCTTCGAATCACATGTTTTGAAGTTGAAAGGCGCTTCGGCGTCACTGTAGGATGGGCCCGCGGTGCATTAGCTAGTTGGTGGGGTAACGGCCTACCAAGGCAACGATGCATAGCCGACCTGAGAGGGTGATCGGCCACATTGGGACTGAGACACGGCCCAAACTCCTACGGGAGGCAGCAGTAGGGAATCTTCCACAATGGACGAAAGTCTGATGGAGCAACGCCGCGTGAGTGATGAAGGTTTTCGGATCG…	1
	H71	AGGGGGGCGGGGGTGCTATACATGCAAGTCGAGCGAATGACGAGAAGCTTGCTTCTCTGATTTAGCGGCGGACGGGTGAGTAACACGTGGGCAACCTGCCCTACAGATCGGGATAACTCAGGGAAACCTGGGCTAATACCGGATAATCCTTCGAATCACATGTTTTGAAGTTGAAAGGCGCTTCGGCGTCACTGTAGGATGGGCCCGCGGTGCATTAGCTAGTTGGTGGGGTAACGGCCTACCAAGGCAACGATGCATAGCCGACCTGAGAGGGTGATCGGCCACATTGGGACTGAGACACGGCCCAAACTCCTACGGGAGGCAGCAGTAGGGAATCTTCCACAATGGACGAAAGTCTGATGGAGCAACGCCGCGTGAGTGATGAAGGTTTTCGGATCG…	1
	H72	GGGTGGGGGGGGACTACACATGCAAGTCGAGCGGCAGCGGGAAAGTAGCTTGCTACTTTTGCCGGCGAGCGGCGGACGGGTGAGTAATGCCTGGGGATCTGCCCAGTCGAGGGGGATAACTACTGGAAACGGCTGCTAATACCGCATACGCCCTACGGGGGAAAGCAGGGGACCTTCGGGCCTTGCGCGATTGGATGAACCCAGGTGGGATTAGCTAGTTGGTGAGGTAATGGCTCACCAAGGCGACGATCCCTAGCTGGTCTGAGAGGATGATCAGCCACACTGGAACTGAGACACGGTCCAGACTCCTACGGGAGGCAGCAGTGGGGAATATTGCACAATGGGGGAAACCCTGATGCAGCCATGCCGCGTGTGTGAAGAAGGCCTTCGGGTTGTAAA…	1
	H73	GGGGGGGGCGGGCTACACATGCAGTCGAGCGGCAGCGGGAAAGTAGCTTGCTACTTTTGCCGGCGAGCGGCGGACGGGTGAGTAATGCCTGGGGATCTGCCCAGTCGAGGGGGATAACTACTGGAAACGGTAGCTAATACCGCATACGCCCTACGGGGGAAAGCAGGGGACCTTCGGGCCTTGCGCGATTGGATGAACCCAGGTGGGATTAGCTAGTTGGTGAGGTAATGGCTCACCAAGGCGACGATCCCTAGCTGGTCTGAGAGGATGATCAGCCACACTGGAACTGAGACACGGTCCAGACTCCTACGGGAGGCAGCAGTGGGGAATATTGCACAATGGGGGAAACCCTGATGCAGCCATGCCGCGTGTGTGAAGAAGGCCTTCGGGTTGTAAAGC…	1
	H74	CGGGGGGGGGGGGCTACACATGCAAGTCGAGCGGCAGCGGGAAAGTAGCTTGCTACTTTTGCCGGCGAGCGGCGGACGGGTGAGTAATGCCTGGGGATCTGCCCAGTCGAGGGGGATAACTACTGGAAACGGTAGCTAATACCGCATACGCCCTACGGGGGAAAGCAGGGGACCTTCGGGCCTTGCGCGATTGGATGAACCCAGGTGGGATTAGCTAGTTGGTGAGGTAATGGCTCACCAAGGCGACGATCCCTAGCTGGTCTGAGAGGATGATCAGCCACACTGGAACTGAGACACGGTCCAGACTCCTACGGGAGGCAGCAGTGGGGAATATTGCACAATGGGGGAAACCCTGATGCAGCCATGCCGCGTGTGTGAAGAAGGCCTTCGGGTTGTAAA…	1
	H75	CCGGGGGGGGGGGGCTACACATGCAGTCGAGCGGCAGCGGGAAAGTAGCTTGCTACTTTTGCCGGCGAGCGGCGGACGGGTGAGTAATGCCTGGGGATCTGCCCAGTCGAGGGGGATAACTACTGGAAACGGTAGCTAATACCGCATACGCCCTACGGGGGAAAGCAGGGGACCTTCGGGCCTTGCGCGATTGGATGAACCCAGGTGGGATTAGCTAGTTGGTGAGGTAATGGCTCACCAAGGCGACGATCCCTAGCTGGTCTGAGAGGATGATCAGCCACACTGGAACTGAGACACGGTCCAGACTCCTACGGGAGGCAGCAGTGGGGAATATTGCACAATGGGGGAAACCCTGATGCAGCCATGCCGCGTGTGTGAAGAAGGCCTTCGGGTTGTAAA…	1
	H76	TCGGGGGGGGCTACACATGCAGTCGAGCGGATGAAGGGAGCTTGCTCCTGGATTCAGCGGCGGACGGGTGAGTAATGCCTAGGAATCTGCCTGGTAGTGGGGGATAACGTCCGGAAACGGGCGCTAATACCGCATACGTCCTGAGGGAGAAAGTGGGGGATCTTCGGACCTCACGCTATCAGATGAGCCTAGGTCGGATTAGCTAGTTGGTGGGGTAAAGGCCTACCAAGGCGACGATCCGTAACTGGTCTGAGAGGATGATCAGTCACACTGGAACTGAGACACGGTCCAGACTCCTACGGGAGGCAGCAGTGGGGAATATTGGACAATGGGCGAAAGCCTGATCCAGCCATGCCGCGTGTGTGAAGAAGGTCTTCGGATTGTAAAGCACTTTAAGTT…	1
	H77	GGGGGGGGGGGCTACACATGCAGTCGAGCGGATGAAGGGTGCTTGCTCCTGGATTCAGCGGCGGACGGGTGAGTAATGCCTAGGAATCTGCCTGGTAGTGGGGGATAACGTCCGGAAACGGGCGCTAATACCGCATACGTCCTGAGGGAGAAAGTGGGGGATCTTCGGACCTCACGCTATCAGATGAGCCTAGGTCGGATTAGCTAGTTGGTGGGGTAAAGGCCTACCAAGGCGACGATCCGTAACTGGTCTGAGAGGATGATCAGTCACACTGGAACTGAGACACGGTCCAGACTCCTACGGGAGGCAGCAGTGGGGAATATTGGACAATGGGCGAAAGCCTGATCCAGCCATGCCGCGTGTGTGAAGAAGGTCTTCGGATTGTAAAGCACTTTAAGT…	1
	H78	AGGGGGGGGGGGCTACACATGCAGTCGAGCGGATGAAGGGAGCTTGCTCCTGGATTCAGCGGCGGACGGGTGAGTAATGCCTAGGAATCTGCCTGGTAGTGGGGGATAACGTCCGGAAACGGGCGCTAATACCGCATACGTCCTGAGGGAGAAAGTGGGGGATCTTCGGACCTCACGCTATCAGATGAGCCTAGGTCGGATTAGCTAGTTGGTGGGGTAAAGGCCTACCAAGGCGACGATCCGTAACTGGTCTGAGAGGATGATCAGTCACACTGGAACTGAGACACGGTCCAGACTCCTACGGGAGGCAGCAGTGGGGAATATTGGACAATGGGCGAAAGCCTGATCCAGCCATGCCGCGTGTGTGAAGAAGGTCTTCGGATTGTAAAGCACTTTAAG…	1
	H79	CGGGGGGGGGGGGGCCTAACACATGCAGGTCGAGCGGCAGCGGGAAAGTAGCTTGCTACTTTTGCCGGCGAGCGGCGGACGGGTGAGTAATGCCTGGGGATCTGCCCAGTCGAGGGGGATAACTACTGGAAACGGTAGCTAATACCGCATACGCCCTACGGGGGAAAGCAGGGGACCTTCGGGCCTTGCGCGATTGGATGAACCCAGGTGGGATTAGCTAGTTGGTGAGGTAATGGCTCACCAAGGCGACGATCCCTAGCTGGTCTGAGAGGATGATCAGCCACACTGGAACTGAGACACGGTCCAGACTCCTACGGGAGGCAGCAGTGGGGAATATTGCACAATGGGGGAAACCCTGATGCAGCCATGCCGCGTGTGTGAAGAAGGCCTTCGGGTTGT…	1
	H80	TGGGGGGGGCCTAACACATGCAGTCGACGGTAACAGGAAGCAAGCTTGCTGCTTTGCTGACGAGTGGCGGACGGGTGAGTAATGTCTGGGAAACTGCCTGATGGAGGGGGATAACTACTGGAAACGGTAGCTAATACCGCATAACGTCGCAAGACCAAAGAGGGGGACCTTCGGGCCTCTTGCCATCGGATGTGCCCAGATGGGATTAGCTAGTAGGTGGGGTAACGGCTCACCTAGGCGACGATCCCTAGCTGGTCTGAGAGGATGACCAGCCACACTGGAACTGAGACACGGTCCAGACTCCTACGGGAGGCAGCAGTGGGGAATATTGCACAATGGGCGCAAGCCTGATGCAGCCATGCCGCGTGTATGAAGAAGGCCTTCGGGTTGTAAAGTACT…	1
	H81	GGGGGGGGGACTACACATGCAAGTCGAGCGGTAGCACAGAGAGCTTGCTCTCGGGTGACGAGCGGCGGACGGGTGAGTAATGTCTGGGAAACTGCCTGATGGAGGGGGATAACTACTGGAAACGGTAGCTAATACCGCATAATGTCGCAAGACCAAAGTGGGGGACCTTCGGGCCTCATGCCATCAGATGTGCCCAGATGGGATTAGCTAGTAGGTGGGGTAACGGCTCACCTAGGCGACGATCCCTAGCTGGTCTGAGAGGATGACCAGCCACACTGGAACTGAGACACGGTCCAGACTCCTACGGGAGGCAGCAGTGGGGAATATTGCACAATGGGCGCAAGCCTGATGCAGCCATGCCGCGTGTATGAAGAAGGCCTTCGGGTTGTAAAGTACTTT…	1
	H82	TGGGGGGGGCTAAACCATGCAAGTCGAGCGGCAGCGGGAAAGTAGCTTGCTACTTTTGCCGGCGAGCGGCGGACGGGTGAGTAATGCCTGGGAAATTGCCCAGTCGAGGGGGATAACAGTTGGAAACGACTGCTAATACCGCATACGCCCTACGGGGGAAAGCAGGGGACCTTCGGGCCTTGCGCGATTGGATATGCCCAGGTGGGATTAGCTAGTTGGTGAGGTAATGGCTCACCAAGGCGACGATCCCTAGCTGGTCTGAGAGGATGATCAGCCACACTGGAACTGAGACACGGTCCAGACTCCTACGGGAGGCAGCAGTGGGGAATATTGCACAATGGGGGAAACCCTGATGCAGCCATGCCGCGTGTGTGAAGAAGGCCTTCGGGTTGTAAAGCA…	1
	H83	GGGGGGGGGCTAATACATGCAGTCGAGCGAACGGACGAGAGTGCTTGCACTCTCTGAAGTTAGCGGCGGACGGGTGAGTAACACGTGGGTAACCTACCTATAAGACTGGGATAACTTCGGGAAACCGGAGCTAATACCGGATAATATTTAGCTTCGCATGAAGCAATAGTGAAAGACGGTTCTGCTGTCACTTATAGATGGACCCGCGGTGTATTAGCTAGTTGGTGAGGTAACGGCTCACCAAGGCAACGATACATAGCCGACCTGAGAGGGTGATCGGCCACACTGGGACTGAGACACGGCCCAGACTCCTACGGGAGGCAGCAGTAGGGAATCTTCCGCAATGGACGAAAGTCTGACGGAGCAACGCCGCGTGAGTGAAGAAGGTTTTCGGATCGT…	1
	H84	AGGGGGGCAGCTACCATGCAGTCGAGCGGTAGCAGGGGAGCTTGGTCCTGGGTGACGAGCGGGGGACGGGTGAGTAATGTGTGGGAAACTGCCTGATGGAGGGGGATATCTACTGTGAACGGTGGCTATTACCGCATAACGTCTTCTGACCCCAGAGGGGGACCTTCTGGCCTCTTGCGATCTCATGTGCCCCCATGGGATTATCTATTATGTGAGGTGATGGGTCTCCTATGCGACAATCCCTATCTGTGCTGAGAGGATGACCACCCACACTGTAACTGAGACACGGTCCACACTCCTACAGGAGGCGGCAGTGGGGAATATTGCGCAATGGGCGCAAGCCTGATGCACCCATGTCGCGTGTATGAAAAAAGCCTTCTGGTTGTAAAGTACTTTCTC…	1
	H85	ATGGGGGCGGGGGGCTAACACATGCAAGTCGAGCGGTAGCACAAGAGAGCTTGCTCTCGGGTGACGAGCGGCGGACGGGTGAGTAATGTCTGGGAAACTGCCTGATGGAGGGGGATAACTACTGGAAACGGTAGCTAATACCGCATAATGTCGCAAGACCAAAGTGGGGGACCTTCGGGCCTCATGCCATCAGATGTGCCCAGATGGGATTAGCTAGTAGGTGGGGTAACGGCTCACCTAGGCGACGATCCCTAGCTGGTCTGAGAGGATGACCAGCCACACTGGAACTGAGACACGGTCCAGACTCCTACGGGAGGCAGCAGTGGGGAATATTGCACAATGGGCGCAAGCCTGATGCAGCCATGCCGCGTGTATGAAGAAGGCCTTCGGGTTGTAAAG…	1
	H86	CGGGGGGGGGAGGCTACACATGCAGTCGAGCGGTAGCACAGAGAGCTTGCTCTCGGGTGACGAGCGGCGGACGGGTGAGTAATGTCTGGGAAACTGCCTGATGGAGGGGGATAACTACTGGAAACGGTAGCTAATACCGCATAATGTCGCAAGACCAAAGTGGGGGACCTTCGGGCCTCATGCCATCAGATGTGCCCAGATGGGATTAGCTAGTAGGTGGGGTAACGGCTCACCTAGGCGACGATCCCTAGCTGGTCTGAGAGGATGACCAGCCACACTGGAACTGAGACACGGTCCAGACTCCTACGGGAGGCAGCAGTGGGGAATATTGCACAATGGGCGCAAGCCTGATGCAGCCATGCCGCGTGTATGAAGAAGGCCTTCGGGTTGTAAAGTACT…	1
	H87	AGGGGGGGGGGGGGCTAAACATGCAAGTCGAGCGGTAGCACAAGAGAGCTTGCTCTCGGGTGACGAGCGGCGGACGGGTGAGTAATGTCTGGGAAACTGCCTGATGGAGGGGGATAACTACTGGAAACGGTAGCTAATACCGCATAACGTCGCAAGACCAAAGAGGGGGACCTTCGGGCCTCTTGCCATCAGATGTGCCCAGATGGGATTAGCTAGTAGGTGGGGTAACGGCTCACCTAGGCGACGATCCCTAGCTGGTCTGAGAGGATGACCAGCCACACTGGAACTGAGACACGGTCCAGACTCCTACGGGAGGCAGCAGTGGGGAATATTGCACAATGGGCGCAAGCCTGATGCAGCCATGCCGCGTGTATGAAGAAGGCCTTCGGGTTGTAAAGT…	1
	H88	TGGGGGGGGGGGCTACACATGCAGTCGAGCGGTAGCACAGAGAGCTTGCTCTCGGGTGACGAGCGGCGGACGGGTGAGTAATGTCTGGGAAACTGCCTGATGGAGGGGGATAACTACTGGAAACGGTAGCTAATACCGCATAATGTCGCAAGACCAAAGTGGGGGACCTTCGGGCCTCATGCCATCAGATGTGCCCAGATGGGATTAGCTAGTAGGTGGGGTAACGGCTCACCTAGGCGACGATCCCTAGCTGGTCTGAGAGGATGACCAGCCACACTGGAACTGAGACACGGTCCAGACTCCTACGGGAGGCAGCAGTGGGGAATATTGCACAATGGGCGCAAGCCTGATGCAGCCATGCCGCGTGTATGAAGAAGGCCTTCGGGTTGTAAAGTACTT…	1
	H89	CGGGGGAGGTCTACACATGCAAGTCGAGCGGTAGCACAGAGAGCTTGCTCTCGGGTGACGAGCGGCGGACGGGTGAGTAATGTCTGGGAAACTGCCTGATGGAGGGGGATAACTACTGGAAACGGTAGCTAATACCGCATAATGTCGCAAGACCAAAGTGGGGGACCTTCGGGCCTCATGCCATCAGATGTGCCCAGATGGGATTAGCTAGTAGGTGGGGTAACGGCTCACCTAGGCGACGATCCCTAGCTGGTCTGAGAGGATGACCAGCCACACTGGAACTGAGACACGGTCCAGACTCCTACGGGAGGCAGCAGTGGGGAATATTGCACAATGGGCGCAAGCCTGATGCAGCCATGCCGCGTGTATGAAGAAGGCCTTCGGGTTGTAAAGTACTTT…	1
	H90	AAGTCGGAAAAAGGGTAACCATAGCAAGTCGAGCGGGGGAGGTAGCTTGCTACTGGACCTAGCGGCGGACGGGTGAGTAATGCTTAGGAATCTGCCTATTAGTGGGGGACAACATCTCGAAAGGGATGCTAATACCGCATACGTCCTACGGGAGAAAGCAGGGGATCTTCGGACCTTGCGCTAATAGATGAGCCTAAGTCGGATTAGCTAGTTGGTGGGGTAAAGGCCTACCAAGGCGACGATCTGTAGCGGGTCTGAGAGGATGATCCGCCACACTGGGACTGAGACACGGCCCAGACTCCTACGGGAGGCAGCAGTGGGGAATATTGGACAATGGGGGGAACCCTGATCCAGCCATGCCGCGTGTGTGAAGAAGGCCTTATGGTTGTAAAGCACTTT…	1
	H91	AGGGGGGGGGGGCTACACATGCAAGTCGAACGGTAGCAGAAAGAAGCTTGCTTCTTTGCTGACGAGTGGCGGACGGGTGAGTAATGTCTGGGAAACTGCCCGATGGAGGGGGATAACTACTGGAAACGGTAGCTAATACCGCATAACGTCTTCGGACCAAAGAGGGGGACCTTCGGGCCTCTTGCCATCGGATGTGCCCAGATGGGATTAGCTAGTAGGTGGGGTAACGGCTCACCTAGGCGACGATCCCTAGCTGGTCTGAGAGGATGACCAGCCACACTGGAACTGAGACACGGTCCAGACTCCTACGGGAGGCAGCAGTGGGGAATATTGCACAATGGGCGCAAGCCTGATGCAGCCATGCCGCGTGTATGAAGAAGGCCTTCGGGTTGTAAAGTA…	1
	H92	TGGGGGATCTAACACATGCAAGTCGAACGGTAACAGGAAGAAGCTTGCTTCTTTGCTGACGAGTGGCGGACGGGTGAGTAATGTCTGGGAAACTGCCTGATGGAGGGGGATAACTACTGGAAACGGTAGCTAATACCGCATAATGTCGCAAGACCAAAGAGGGGGACCTTCGGGCCTCTTGCCATCGGATGTGCCCAGATGGGATTAGCTTGTTGGTGGGGTAACGGCTCACCAAGGCGACGATCCCTAGCTGGTCTGAGAGGATGACCAGCCACACTGGAACTGAGACACGGTCCAGACTCCTACGGGAGGCAGCAGTGGGGAATATTGCACAATGGGCGCAAGCCTGATGCAGCCATGCCGCGTGTATGAAGAAGGCCTTCGGGTTGTAAAGTACTT…	1
	H93	GCGGGGGGGGGGGCCTACACATGCAGTCGAGCGGCAGCGGGAAAGTAGCTTGCTACTTTTGCCGGCGAGCGGCGGACGGGTGAGTAATGCCTGGGGATCTGCCCAGTCGAGGGGGATAACTACTGGAAACGGTAGCTAATACCGCATACGCCCTACGGGGGAAAGCAGGGGACCTTCGGGCCTTGCGCGATTGGATGAACCCAGGTGGGATTAGCTAGTTGGTGAGGTAATGGCTCACCAAGGCGACGATCCCTAGCTGGTCTGAGAGGATGATCAGCCACACTGGAACTGAGACACGGTCCAGACTCCTACGGGAGGCAGCAGTGGGGAATATTGCACAATGGGGGAAACCCTGATGCAGCCATGCCGCGTGTGTGAAGAAGGCCTTCGGGTTGTAAA…	1
	H94	AGTGTGGGGGGGGGACTAACCATGCAGTCGAGCGGTAGCACAAGAGAGCTTGCTCTCTGGGTGACGAGCGGCGGACGGGTGAGTAATGTCTGGGAAACTGCCTGATGGAGGGGGATAACTACTGGAAACGGTAGCTAATACCGCATGACGTCTTCGGACCAAAGTGGGGGACCTTCGGGCCTCACGCCATCAGATGTGCCCAGATGGGATTAGCTAGTAGGTGGGGTAATGGCTCACCTAGGCGACGATCTCTAGCTGGTCTGAGAGGATGACCAGCCACACTGGAACTGAGACACGGTCCAGACTCCTACGGGAGGCAGCAGTGGGGAATATTGCACAATGGGCGCAAGCCTGATGCAGCCATGCCGCGTGTATGAAGAAGGCCTTCGGGTTGTAAAG…	1
	H95	GCGTGGGGCAGGCTACCATGCAGTCGAGCGGTAGCACAGGGAGCTTGCTCCTGGGTGACGAGCGGCGGACGGGTGAGTAATGTCTGGGAAACTGCCTGATGGAGGGGGATAACTACTGGAAACGGTAGCTAATACCGCATAACGTCTTCGGACCAAAGAGGGGGACCTTCGGGCCTCTTGCCATCACATGTGCCCAGATGGGATTAGCTATTAGGTGAGGTAATGGCTCACCTAGGCGACAATCCCTATCTGGTCTGAGAGGATGACCAGCCACACTGGAACTGAGACACGGTCCAGACTCCTACGGGAGGCAGCAGTGGGGAATATTGCACAATGGGCGCAAGCCTGATGCAGCCATGCCGCGTGTATGAAGAAGGCCTTCGGGTTGTAAAGTACTTT…	1
	H96	AGGGGGGGGGCTACACATGCAGTCGGACGGTAGCACAGAGAATTGGTTCCTTGTGTGAAGAGTGGCGAAGGGGAGAGTAGTGTGTGGAGATCTGCCCTATAGAGGGAGATAACCTCTGGAAACGGGGTATAATACCGCATAACCTCACAAGACCAAAGAGGGGGACCTTCGGCTCTCTCTCTATCATGTGCCCCCATATGGTATTATCTAATACGCGGGGTAGTGCCCCCCCTACGACAATATCCCTATGTGGTCTGAGAAGATGACCACCCACTCTGGATCTGACACACGGCCCACACTCCTACGGGAGGCAACAGTGGAGAATATTGCACTGTGGGCGCAACTCTGATGCACCCGTGCCGCGTGTATGAAAAGGGTCTTCGGGGTGTAAAACTCTTT…	1
	H97	GGGGGGACTAACACATGCAGTCGAACGGTAACAGGAAGAAGCTTGCTTCTTTGCTGACGAGTGGCGGACGGGTGAGTAATGTCTGGGAAACTGCCTGATGGAGGGGGATAACTACTGGAAACGGTAGCTAATACCGCATAACGTCGCAAGACCAAAGAGGGGGACCTTCGGGCCTCTTGCCATCGGATGTGCCCAGATGGGATTAGCTTGTTGGTGGGGTAACGGCTCACCAAGGCGACGATCCCTAGCTGGTCTGAGAGGATGACCAGCCACACTGGAACTGAGACACGGTCCAGACTCCTACGGGAGGCAGCAGTGGGGAATATTGCACAATGGGCGCAAGCCTGATGCAGCCATGCCGCGTGTATGAAGAAGGCCTTCGGGTTGTAAAGTACTTTC…	1

## Sheet: Haplotype region count
	Sampling location	H1	H10	H11	H12	H13	H14	H15	H16	H17	H18	H19	H2	H20	H21	H22	H23	H24	H25	H26	H27	H28	H29	H3	H30	H31	H32	H33	H34	H35	H36	H37	H38	H39	H4	H40	H41	H42	H43	H44	H45	H46	H47	H48	H49	H5	H50	H51	H52
	BBS mall	0	0	0	0	0	0	0	0	0	0	0	0	0	0	0	0	0	0	0	0	0	0	0	0	0	0	0	0	0	0	0	0	0	0	0	0	0	0	0	0	0	0	0	0	0	0	0	0
	Block 3	0	0	0	0	0	0	0	0	0	0	0	0	0	0	0	0	0	0	0	0	0	0	0	0	0	0	0	0	0	0	0	0	0	0	0	0	0	0	0	0	0	0	0	0	0	0	0	0
	Block 5	0	0	0	0	0	0	0	0	0	0	1	0	1	1	1	1	0	0	0	0	0	0	0	0	0	0	0	0	0	0	0	0	0	0	0	0	0	0	0	0	0	0	0	0	0	0	0	0
	Block 6	0	0	0	0	0	0	0	0	0	0	0	0	0	0	0	0	0	0	0	0	0	0	0	0	0	0	0	0	0	0	0	0	0	0	0	0	0	0	0	0	0	0	0	0	0	0	0	0
	Block 8	0	0	0	0	0	0	0	0	0	0	0	0	0	0	0	0	0	0	0	0	0	0	0	0	0	0	0	0	0	0	0	0	0	0	0	0	0	0	0	0	0	0	0	0	0	0	0	0
	Extension 4	0	0	0	0	0	0	0	0	0	0	0	0	0	0	0	0	0	0	0	0	0	0	0	0	0	0	0	0	0	0	0	0	0	0	0	0	0	1	1	1	1	1	0	0	0	0	0	0
	G-west	0	0	0	0	0	0	0	0	0	0	0	0	0	0	0	0	0	0	0	0	0	0	0	0	0	0	0	0	0	0	0	1	1	0	1	1	1	0	0	0	0	0	0	0	0	0	0	0
	G-west industrial	0	0	0	0	0	0	0	0	0	0	0	0	0	0	0	0	0	0	0	0	0	0	0	0	0	0	0	0	0	0	0	0	0	0	0	0	0	0	0	0	0	0	0	0	0	0	0	0
	Ledumang	1	0	0	0	0	0	0	0	0	0	0	1	0	0	0	0	0	0	0	0	0	0	1	0	0	0	0	0	0	0	0	0	0	1	0	0	0	0	0	0	0	0	0	0	1	0	0	0
	Maruapula	0	0	0	0	0	0	0	0	0	0	0	0	0	0	0	0	1	1	1	1	0	0	0	0	0	0	0	0	0	0	0	0	0	0	0	0	0	0	0	0	0	0	0	0	0	0	0	0
	Old Naledi	0	0	0	0	0	0	0	0	0	0	0	0	0	0	0	0	0	0	0	0	0	0	0	0	0	0	0	0	0	0	0	0	0	0	0	0	0	0	0	0	0	0	0	0	0	0	0	0
	Partial	0	0	0	0	0	0	0	0	0	0	0	0	0	0	0	0	0	0	0	0	1	1	0	1	1	1	0	0	0	0	0	0	0	0	0	0	0	0	0	0	0	0	0	0	0	0	0	0
	Phakalane	0	0	0	0	0	0	0	0	0	0	0	0	0	0	0	0	0	0	0	0	0	0	0	0	0	0	0	0	0	0	0	0	0	0	0	0	0	0	0	0	0	0	0	0	0	0	0	0
	Phase 2	0	1	1	1	1	1	0	0	0	0	0	0	0	0	0	0	0	0	0	0	0	0	0	0	0	0	0	0	0	0	0	0	0	0	0	0	0	0	0	0	0	0	0	0	0	0	0	0
	Phase 4	0	0	0	0	0	0	0	0	0	0	0	0	0	0	0	0	0	0	0	0	0	0	0	0	0	0	1	1	1	1	1	0	0	0	0	0	0	0	0	0	0	0	0	0	0	0	0	0
	Sebele	0	0	0	0	0	0	1	1	1	1	0	0	0	0	0	0	0	0	0	0	0	0	0	0	0	0	0	0	0	0	0	0	0	0	0	0	0	0	0	0	0	0	0	0	0	0	0	0
	Station	0	0	0	0	0	0	0	0	0	0	0	0	0	0	0	0	0	0	0	0	0	0	0	0	0	0	0	0	0	0	0	0	0	0	0	0	0	0	0	0	0	0	1	1	0	1	1	1
[truncated: 49 more columns]

## Sheet: Halotype by location
	Isolate	Sampling location	Haplotype
	TB1	Ledumang	H1
	TB2	Ledumang	H2
	TB3	Ledumang	H3
	TB4	Ledumang	H4
	TB5	Ledumang	H5
	TB7	Phakalane	H6
	TB8	Phakalane	H7
	TB9	Phakalane	H8
	TB10	Phakalane	H9
	TB11	Phase 2	H10
	TB12	Phase 2	H11
	TB13	Phase 2	H12
	TB14	Phase 2	H13
	TB15	Phase 2	H14
	TB16	Sebele	H15
	TB17	Sebele	H16
	TB18	Sebele	H17
	TB20	Sebele	H18
	TB21	Block 5	H19
	TB22	Block 5	H20
	TB23	Block 5	H21
	TB24	Block 5	H22
	TB25A	Block 5	H23
	TB25B	Maruapula	H24
	TB27	Maruapula	H25
	TB28	Maruapula	H26
	TB29	Maruapula	H27
	TB30	Partial	H28
	TB31	Partial	H29
	TB31A	Partial	H30
	TB32	Partial	H31
	TB33	Partial	H32
	TB34	Phase 4	H33
	TB35	Phase 4	H34
	TB36	Phase 4	H35
	TB37	Phase 4	H36
	TB37A	Phase 4	H37
	TB38	G-west	H38
	TB39	G-west	H39
	TB40	G-west	H40
	TB41	G-west	H41
	TB42	G-west	H42
	TB43	Extension 4	H43
	TB44	Extension 4	H44
	TB45	Extension 4	H45
	TB46	Extension 4	H46
	TB47	Extension 4	H47
	TB48	Station	H48
	TB49	Station	H49
	TB50	Station	H50
	TB51	Station	H51
	TB52	Station	H52
	TB53	BBS mall	H53
	TB54	BBS mall	H54
	TB55	BBS mall	H55
	TB56	BBS mall	H56
	TB57	BBS mall	H57
	TB58	G-west	H58
	TB59	G-west	H59
	TB60	G-west	H60
	TB61	G-west	H61
	TB62	G-west	H62
	TB64	G-west industrial	H63
	TB64A	G-west industrial	H64
	TB65	G-west industrial	H65
	TB66	G-west industrial	H66
	TB67	G-west industrial	H67
	TB68	Block 8	H68
	TB69	Block 8	H69
	TB70	Block 8	H70
	TB71	Block 8	H71
	TB72	Block 8	H72
	TB73	Old Naledi	H73
	TB74	Old Naledi	H74
	TB75	Old Naledi	H75
	TB76	Old Naledi	H76
	TB77	Old Naledi	H77
	TB78A	Old Naledi	H78
	TB78B	Old Naledi	H79
	TB80	Block 3	H80
	TB81	Block 3	H81
	TB82	Block 3	H82
	TB83	Block 3	H83
	TB84	Block 3	H84
	TB85	Block 3	H85
	TB86	Block 3	H86
	TB87	Block 6	H87
	TB88	Block 6	H88
	TB89	Block 6	H89
	TB90	Block 6	H90
	TB91	Block 6	H91
	TB92	Block 6	H92
	TB93	Block 6	H93
	TB94	Block 6	H94
	TB95	Block 6	H95
	TB96	Block 6	H96
	TB97	Block 6	H97
